# Supplementary material
Source: Springer Nature journal article supplement (https://www.springermedizin.de/resource/supplementary/13002_2008_121_MOESM1_ESM.pdf/9627200)
Supplement: MOESM1 [file 9627200]

**Additional file 1**

**Table1- animals and their products used in respiratory problems in India.**

| S. No. |              | English Name     | Scientific Name                               | Tribe/ Inhabitant/ Region                                                                | Parts uses | Disease                                                 | Method of preparation and medicinal use                                                                                                                                                                                                                                                                | Related reported author in India |
|--------|--------------|------------------|-----------------------------------------------|------------------------------------------------------------------------------------------|------------|---------------------------------------------------------|--------------------------------------------------------------------------------------------------------------------------------------------------------------------------------------------------------------------------------------------------------------------------------------------------------|----------------------------------|
| 1.     | Invertebrate | Honey bee        | <i>Apis cerana indica</i> (Fabricius 1798)    | Kanikaran tribes                                                                         | Honey      | Asthma, Cough and Cold                                  | One gram of the shade-dried seeds powder mixture of <i>Piper nigrum</i> and <i>Piper longum</i> , leaves of <i>Adhatoda vasica</i> and <i>Ocimum sanctum</i> and the roots of <i>Glycyrrhiza glabra</i> , <i>Alpinia galanga</i> , <i>Costus speciosus</i> used with 10 <sup>9</sup> of natural honey. | Solavan A et al (2004)           |
| 2.     | Invertebrate | Honey bee        | <i>Apis cerana indica</i> (Fabricius 1798)    | Tirunelveli district, Tamil Nadu                                                         | Honey      | Cough, even Whooping cough, Asthma                      | It is given to old people and children every day by mixing it with water or milk. . It is also used as a vehicle for plant medicine.                                                                                                                                                                   | Ranjit Singh et al (2004)        |
| 3.     | Invertebrate | Honey bee        | <i>Apis florea</i> (Fabricius, 1787)          | Tirunelveli district, Tamil Nadu                                                         | Honey      | Cough, even Whooping cough, Asthma                      | It is given to old people and children every day by mixing it with water or milk. . It is also used as a vehicle for plant medicine.                                                                                                                                                                   | Ranjit Singh et al (2004)        |
| 4.     | Invertebrate | Honey bee        | <i>Apis dorsata</i> (Fabricius, 1793)         | Tirunelveli district, Tamil Nadu                                                         | Honey      | Cough, even Whooping cough, Asthma, Fever and Dyspepsia | It is given to old people and children every day by mixing it with water or milk. . It is also used as a vehicle for plant medicine.                                                                                                                                                                   | Ranjit Singh et al (2004)        |
| 5.     | Invertebrate | Cockroach        | <i>Blatta orientalis</i> Linnaeus, 1758       | Ao, Angami, Sema, Khamniungan, Chakhesang, Lotha, Zeliang, Pochury, and Rengma Nagaland. | Whole body | Asthma and tuberculosis                                 | Cockroaches are eaten raw as a remedy measure for relieving asthma and tuberculosis.                                                                                                                                                                                                                   | Jamir and Lal (2005)             |
| 6.     | Invertebrate | Crab             | <i>Cancer pagurus</i> (Linnaeus, 1758)        | Saharia tribe                                                                            | Whole body | Cough, asthma, tuberculosis                             | Ash of crab is used in lung diseases as cough, asthma, tuberculosis, etc.                                                                                                                                                                                                                              | Mahawar and Jaroli (2007)        |
| 7.     | Invertebrate | Cochineal insect | <i>Dactylopius coccus</i> (Costa, 1835)       | Tirunelveli district, Tamil Nadu                                                         | Whole body | Whooping cough                                          | The insects are crushed, put into boiling water and then dried to prepare powder. The powder is used to treat whooping cough.                                                                                                                                                                          | Ranjit Singh et al (2004)        |
| 8.     | Invertebrate | Earthworm        | <i>Pheretima posthuma</i> (L. Vaillant, 1868) | Kanikaran tribes                                                                         | Mucous     | Asthma                                                  | Five to six adult earthworms are subjected to ex-osmotic pressure for 2 hrs in 5 g of sugar to extract their                                                                                                                                                                                           | Solavan et al (2004)             |

|     |              |                          |                                                                                    |                                                                                                           |              |                             |                                                                                                                                                                                   |                                 |
|-----|--------------|--------------------------|------------------------------------------------------------------------------------|-----------------------------------------------------------------------------------------------------------|--------------|-----------------------------|-----------------------------------------------------------------------------------------------------------------------------------------------------------------------------------|---------------------------------|
|     |              |                          |                                                                                    |                                                                                                           |              |                             | body fluid in the form of mucous.                                                                                                                                                 |                                 |
| 9.  | Invertebrate | Pod Borer                | <i>Helicoverpa armigera</i> (Hubner, 1805)                                         | Chhattishgadh                                                                                             | Caterpillar  | Asthma                      | Helicoverpa caterpillar feeding on <i>Sphaeranthus</i> leaves is used for the treatment of asthma.                                                                                | Podia (1995)                    |
| 10. | Invertebrate | Prawn                    | <i>Macrobrachium malcolmsonii</i> (H. Milne-Edwards, 1844)                         | Saharia tribe                                                                                             | Dried powder | Tuberculosis                | Taken for cure of Tuberculosis.                                                                                                                                                   | Mahawar and Jaroli (2007)       |
| 11. | Invertebrate | Sandy shore Crab         | <i>Matuta planipes</i> (Fabricius, 1798)<br>Synonym- <i>Matuta victor</i>          | Kachchh                                                                                                   | Whole body   | Asthma                      | Crab is boiled in water and then the inner watery part taken for asthma; boiled in oil and used externally for curing ear pains. Crab is eaten for the treatment of tuberculosis. | Gupta Leena et al (2003)        |
| 12. | Invertebrate | Green Leafhopper (GLH)   | <i>Nephotettix nigropictus</i> (Stal, 1870)                                        | Chhattishgadh                                                                                             | Whole body   | Asthma                      | GLH with <i>Kukronda</i> ( <i>Blumea lacera</i> ) are used to reduce the intensity of asthma attack.                                                                              | Oodhia (2003 c)                 |
| 13. | Invertebrate | Apple Snail              | <i>Pila globosa</i> (Swainson, 1822)                                               | Ao, Angami, Sema, Khamniungan, Lotha, Chakhesang, Sangtam, Pochury, Konyak and Rengma tribes of Nagaland. | Flesh        | Asthma, Tuberculosis        | Flesh is eaten after cooking as a relief measure in asthma, tuberculosis.                                                                                                         | Jamir and Lal (2005)            |
| 14. | Invertebrate | Hermit Crab              | <i>Uca pugnax</i>                                                                  | Kachchh                                                                                                   | Whole body   | Asthma                      | Crab is boiled in water and then taken for asthma.                                                                                                                                | Gupta Leena et al (2003)        |
| 15. | Pisces       | Eel                      | <i>Amphipnous cuchia</i> (Hamilton, 1822).                                         | Ao Tribe of Nagaland                                                                                      | Blood        | Asthma                      | Fresh blood is drunk.                                                                                                                                                             | Kakati et al (2006)             |
| 16. | Pisces       | Eel Fish                 | <i>Monopterus albus</i> (Zuiew, 1793)<br><i>Monopterus cuchia</i> (Hamilton, 1822) | Ao, Angami, Sema, Khamniungan, Lotha, Zeliang, Sangtam, Pochury, Konyak and Rengma tribes of Nagaland.    | Blood        | Asthma                      | Fresh blood is drunk to cure asthma.                                                                                                                                              | Jamir and Lal (2005)            |
| 17. | Reptile      | Hardshelled Turtle.      | <i>Kachuga tentoria</i> (Gray, 1834)                                               | Mogya, Bawaria, Meena and Saharia tribe of Rajasthan                                                      | Carapace     | Cough, asthma, Tuberculosis | Ash of carapace is used in lung diseases as cough, asthma, tuberculosis, etc.                                                                                                     | Mahawar and Jaroli (2006, 2007) |
| 18. | Reptile      | Indian Flap shell turtle | <i>Lissemys punctata</i> (Lacépède, 1788)                                          | Kachchh                                                                                                   | Carapace     | Cough                       | Carapace is burnt and ash is used for healing of cough.                                                                                                                           | Gupta Leena et al (2003)        |
| 19. | Aves         | Bank myna                | <i>Acridotheres ginginianus</i> (Latham, 1790)                                     | Kachchh                                                                                                   | Flesh        | Whooping cough              | Roasted flesh is eaten to treat whooping cough.                                                                                                                                   | Gupta Leena et al (2003)        |
| 20. | Aves         | Pigeon                   | <i>Columba livia</i>                                                               | Ao Tribe of Nagaland                                                                                      | Flesh        | Asthma                      | Soup is warmed and applied locally.                                                                                                                                               | Kakati et al                    |

|     |        |                           |                                                           |                                                                                                          |           |                           |                                                                                                                                                     |                                           |
|-----|--------|---------------------------|-----------------------------------------------------------|----------------------------------------------------------------------------------------------------------|-----------|---------------------------|-----------------------------------------------------------------------------------------------------------------------------------------------------|-------------------------------------------|
|     |        |                           | (Gmelin, 1789).                                           |                                                                                                          |           |                           |                                                                                                                                                     | (2006)                                    |
| 21. | Aves   | Crow                      | <i>Corvus splendens</i><br>(Vieillot, 1817)               | Kachchh                                                                                                  | Flesh     | Whooping cough            | Roasted or boiled flesh is eaten to treat whooping cough.                                                                                           | Gupta Leena et al (2003)                  |
| 22. | Aves   | Crow                      | <i>Corvus splendens</i><br>(Vieillot, 1817)               | Chhattishgadh                                                                                            | Excreta   | Cough                     | Few drops of juice of freshly collected excreta are sufficient to cure chronic cough.                                                               | Oodhia (2003 b)                           |
| 23. | Aves   | Jungle fowl               | <i>Gallus sonneratii</i><br>(Temminck, 1813)              | Ao Tribe of Nagaland                                                                                     | Flesh     | Asthma, Breathing problem | Properly cooked and eaten.                                                                                                                          | Kakati et al (2006)                       |
| 24. | Aves   | White-breasted Kingfisher | <i>Halcyon smyrnensis</i><br>(Linnaeus, 1758)             | Bhil, Garasia, Kathodia of Rajasthan                                                                     | Feather   | Typhoid                   | Ash of feather and flesh is used in cure of typhoid.                                                                                                | Sharma (2002)                             |
| 25. | Aves   | White-breasted Kingfisher | <i>Halcyon smyrnensis</i><br>(Linnaeus, 1758)             | Bhil, Garasia, Kathodia of Rajasthan                                                                     | Flesh     | Typhoid                   | Ash of feather and flesh is used in cure of typhoid.                                                                                                | Sharma (2002)                             |
| 26. | Aves   | House sparrow             | <i>Passer domesticus</i><br>(Linnaeus, 1758)              | Kachchh                                                                                                  | Droppings | Asthma                    | Ash of excreta is used for treatment of asthma in children (three times a day with water for couple of days)                                        | Gupta Leena et al (2003)                  |
| 27. | Aves   | Peacock                   | <i>Pavo cristatus</i><br>(Linnaeus, 1758)                 | Nandurbar district of Maharashtra                                                                        | Feather   | Cough                     | The ash of feather is used for cough.                                                                                                               | Patil (2003)                              |
| 28. | Aves   | Red-wattled bird          | <i>Vanellus indicus</i><br>(Boddaert, 1783)               | Shoka tribe of Uttaranchal                                                                               | Yolk egg  | Typhoid                   | The yolk when applied on head is said to Lapwing cure typhoid. Often the local practitioners preserve the eggs within the cow dung for future use.  | Negi and palyal (2007)                    |
| 29. | Mammal | Bison                     | Bison bison<br>(Linnaeus, 1758)                           | Chhattishgadh                                                                                            | Excreta   | Asthma                    | The daily intake of excreta with honey in small dose is considered as beneficial to give strength to lungs and it is very useful in Chronic asthma. | Oodhia (2003 b)                           |
| 30. | Mammal | Jackal                    | <i>Canis aureus</i><br>(Linnaeus, 1758)                   | Kachchh                                                                                                  | Flesh     | Asthma                    | Roasted flesh is eaten to cure asthma.                                                                                                              | Gupta Leena et al (2003)                  |
| 31. | Mammal | Jackal                    | <i>Canis aureus</i><br>(Linnaeus, 1758)<br><i>indicus</i> | Shoka tribe of Uttaranchal                                                                               | Blood     | Asthma                    | Blood is given to the patients suffering from asthma.                                                                                               | Negi and palyal (2007)                    |
| 32. | Mammal | Goat                      | <i>Capra falconeri</i><br>(Wagner, 1839)                  | Shoka tribe of Uttaranchal                                                                               | Flesh     | Rhinitis                  | The meat is believed to stimulate digestion and cures rhinitis.                                                                                     | Negi and palyal (2007)                    |
| 33. | Mammal | Goat                      | <i>Capra sibirica</i><br>(Pallas, 1776)                   | Ao, Angami, Sema, Khamniungan, Chakhesang, Lotha, Zeliang, Sangtam, Pochury, Konyak and Rengma tribes of | Urine     | Asthma, Tuberculosis      | Drunk directly.                                                                                                                                     | Kakati et al (2006), Jamir and Lal (2005) |

|     |        |                  |                                                                            |                                                                                                                             |                                                             |                      |                                                                                                               |                                            |
|-----|--------|------------------|----------------------------------------------------------------------------|-----------------------------------------------------------------------------------------------------------------------------|-------------------------------------------------------------|----------------------|---------------------------------------------------------------------------------------------------------------|--------------------------------------------|
|     |        |                  |                                                                            | Nagaland.                                                                                                                   |                                                             |                      |                                                                                                               |                                            |
| 34. | Mammal | Bat              | <i>Cynopterus sphinx</i><br>(Vahl, 1797)                                   | Kachchh                                                                                                                     | Flesh                                                       | whooping cough       | Raw flesh having blood is rubbed on the external injuries for healing and also eaten to treat whooping cough. | Gupta Leena et al (2003)                   |
| 35. | Mammal | Hyena            | <i>Hyaena hyaena</i><br>(Linnaeus, 1758)                                   | Kachchh                                                                                                                     | Flesh                                                       | Asthma               | Blood is applied on cloth and the dried cloth is fumigated to cure asthma.                                    | Gupta Leena et al (2003)                   |
| 36. | Mammal | Porcupine        | <i>Hystrix indica</i><br>(Kerr, 1792)                                      | Kachchh                                                                                                                     | Squills                                                     | Respiratory problems | Squills are fumigated for respiratory problems in children.                                                   | Gupta Leena et al (2003)                   |
| 37. | Mammal | Porcupine        | <i>Hystrix indica</i><br>(Kerr, 1792)                                      | Shoka tribe of Uttaranchal                                                                                                  | Stomach and intestinal parts are dried (with fecal matter), | Asthma               | Stomach and intestinal parts are dried (along with the fecal matter), is given in the treatment of asthma.    | Negi and palyal (2007)                     |
| 38. | Mammal | Indian Hare      | <i>Lepus nigricollis</i><br>(F. Cuvier, 1823)                              | Bhil, Garasia, Kathodia of Rajasthan                                                                                        | Ash                                                         | Cough                | Ash of hare is given to cure cough.                                                                           | Sharma (2002)                              |
| 39. | Mammal | Indian Hare      | <i>Lepus nigricollis</i><br>(F. Cuvier, 1823)                              | Bhil, Garasia, Kathodia of Rajasthan                                                                                        | Flesh                                                       | Typhoid              | Flesh is eaten to treatment.                                                                                  | Sharma (2002)                              |
| 40. | Mammal | Indian Hare      | <i>Lepus nigricollis</i><br>(F. Cuvier, 1823)                              | Shoka tribe of Uttaranchal                                                                                                  | Blood                                                       | Asthma               | Blood of rabbit is used in asthma.                                                                            | Negi and palyal (2007)                     |
| 41. | Mammal | Monkey           | <i>Macaca mulatta</i><br>(Zimmermann, 1780)                                | Shoka tribe of Uttaranchal                                                                                                  | Flesh                                                       | Asthma,              | The meat is believed to cure asthma.                                                                          | Negi and palyal (2007)                     |
| 42. | Mammal | Monkey           | <i>Macaca</i> (All species)<br><i>Macaca mulatta</i><br>(Zimmermann, 1780) | Ao, Angami, Sema, Khamniungan, Lotha, Zeliang, Sangtam, Pochury, Konyak and Rengma tribes of Nagaland.                      | Meat                                                        | Tuberculosis ,       | Meat of all monkey species is eaten by Naga tribes. It is general belief that monkey meat cures tuberculosis. | Jamir and Lal (2005)                       |
| 43. | Mammal | Bat              | <i>Myotis lucifugus</i><br>(LeConte, 1831)                                 | Ao, Angami, Sema, Khamniungan, Chakhesang, Lotha, Zeliang, Pochury, Konyak and Rengma tribes of Nagaland., Kanikaran tribes | Flesh                                                       | Asthma,              | Flesh is cooked and eaten for curing asthma.                                                                  | Jamir and Lal (2005), Solavan et al (2004) |
| 44. | Mammal | Sherni (Tigress) | <i>Panthera tigris</i><br>(Linnaeus, 1758)                                 | Chhattishgadhd                                                                                                              | Milk                                                        | Asthma               | This milk is also used in treatment of asthma.                                                                | Oodhia (2003 a)                            |

|     |        |                   |                                                                                        |                                      |       |                               |                                                                                                                                                                                                                                   |                          |
|-----|--------|-------------------|----------------------------------------------------------------------------------------|--------------------------------------|-------|-------------------------------|-----------------------------------------------------------------------------------------------------------------------------------------------------------------------------------------------------------------------------------|--------------------------|
| 45. | Mammal | Pale hedgehog     | <i>Paraechinus micropus</i> (Blyth, 1846)                                              | Kachchh                              | Skin  | Respiratory problems and cold | Ash of skin is used for respiratory problems and cold.                                                                                                                                                                            | Gupta Leena et al (2003) |
| 46. | Mammal | Flying squirrel   | <i>Petaurista petaurista</i> (Pallas, 1766)                                            | Ao Tribe of Nagaland                 | Bile  | Asthma                        | Boiled in water and drunk.                                                                                                                                                                                                        | Kakati et al (2006)      |
| 47. | Mammal | Hanuman Monkey    | <i>Semnopithecus entellus</i> (Defense, 1797)<br>Synonym-<br><i>Presbytis entellus</i> | Bhil, Garasia, Kathodia of Rajasthan | Urine | Severe Cough                  | A drop of urine mixed with 100 ml water is given in severe cough.                                                                                                                                                                 | Sharma (2002)            |
| 48. | Mammal | Black monkey      | <i>Semnopithecus johnii</i><br>Synonym-<br><i>Presbytis johni</i>                      | Kanikaran tribes                     | Blood | Asthma                        | The fresh blood is consumed as such by the tribal population. In some cases the meat of the monkey is cooked with the seeds of <i>Piper nigrum</i> , the stem of <i>Zingiber officinale</i> , root of the <i>Allium sativum</i> . | Solavan et al (2004)     |
| 49. | Mammal | Black monkey      | <i>Semnopithecus johnii</i><br>Synonym-<br><i>Presbytis johni</i>                      | Kanikaran tribes                     | flesh | Asthma                        | The fresh blood is consumed as such by the tribal population. In some cases the meat of the monkey is cooked with the seeds of <i>Piper nigrum</i> , the stem of <i>Zingiber officinale</i> , root of the <i>Allium sativum</i> . | Solavan et al (2004)     |
| 50. | Mammal | Indian Flying Fox | <i>Pteropus giganteus</i> (Brünnich, 1782)                                             | Bhil, Garasia, Kathodia of Rajasthan | Flesh | Asthma                        | Flesh is given to cure asthma.                                                                                                                                                                                                    | Sharma (2002)            |

**Table 2- Animals and their products used in human gastric problems in India,**

| S.N. |              | English Name | Scientific Name                           | Tribe/ Inhabitant/ Region                                                                    | Parts uses | Disease                            | Method of preparation and medicinal use                                                                                                 | Related reported author in India |
|------|--------------|--------------|-------------------------------------------|----------------------------------------------------------------------------------------------|------------|------------------------------------|-----------------------------------------------------------------------------------------------------------------------------------------|----------------------------------|
| 1.   | Invertebrate | Bed Bug      | <i>Cimex lectularius</i> (Linnaeus, 1758) | Chhattishgadh                                                                                | Whole body | Piles                              | External application on piles, inside the urethra (in case of urine retention).                                                         | Oodhia (1995)                    |
| 2.   | Invertebrate | Crab         | <i>Cancer pagurus</i> (Linnaeus, 1758)    | Ao, Angami, Sema, Khamniungan, Chakhesang, Lotha, Zeliang, Sangtam, Yimchunger, Pochury, and | Whole body | Jaundice and other liver disorders | The whole body is crushed into a paste and boiled in water to prepare a drink which helps in curing Jaundice and other liver disorders. | Jamir and Lal (2005)             |

|     |              |                     |                                                                   |                                                                                                            |         |                    |                                                                                               |  |                           |
|-----|--------------|---------------------|-------------------------------------------------------------------|------------------------------------------------------------------------------------------------------------|---------|--------------------|-----------------------------------------------------------------------------------------------|--|---------------------------|
|     |              |                     |                                                                   | Rengma tribes of Nagaland.                                                                                 |         |                    |                                                                                               |  |                           |
| 3.  | Invertebrate | Honey bee           | <i>Apis cerana indica</i> (Fabricius 1798)                        | Tirunelveli district, Tamil Nadu                                                                           | Wax     | Fistula and piles  | Applied externally.                                                                           |  | Ranjit Singh et al (2004) |
| 4.  | Invertebrate | Honey bee           | <i>Apis dorsata</i> (Fabricius, 1793)                             | Tirunelveli district, Tamil Nadu                                                                           | Wax     | Fistula and piles  | Applied externally.                                                                           |  | Ranjit Singh et al (2004) |
| 5.  | Invertebrate | Honey bee           | <i>Apis florea</i> (Fabricius, 1787)                              | Tirunelveli district, Tamil Nadu                                                                           | Wax     | Fistula and piles  | Applied externally.                                                                           |  | Ranjit Singh et al (2004) |
| 6.  | Invertebrate | Apple Snail         | <i>Pila globosa</i> (Swainson, 1822)                              | Ao, Angami, Sema, Khiamniungan, Chakhesang, Lotha, Sangtam, Pochury, Konyak and Rengma tribes of Nagaland. | Flesh   | Stomach disorders. | Flesh is eaten after cooking as a relief measure in stomach disorders.                        |  | Jamir and Lal (2005)      |
| 7.  | Reptile      | Monitor             | <i>Varanus bengalensis</i> (Daudin, 1758)                         | Ao Tribe of Nagaland                                                                                       | Skin    | Piles              | Cooked and eaten.                                                                             |  | Kakati et al (2006)       |
| 8.  | Aves         | Pigeon              | <i>Columba livia</i> (Gmelin, 1789)                               | Chhattishgadh                                                                                              | Excreta | Bleeding piles,    | Use the excreta with the freshly collected flowers of Babool ( <i>Acacia nilotica</i> ).      |  | Oodhia (2003 b)           |
| 9.  | Aves         | House sparrow       | <i>Passer domesticus</i> (Linnaeus, 1758)                         | Mogya, Bawaria, Meena tribe of Rajasthan                                                                   | Fecal   | Constipation       | Fecal matter is applied in the anus of baby to treat constipation.                            |  | Mahawar and Jaroli (2006) |
| 10. | Aves         | Barn or Screech Owl | <i>Tyto alba</i> (Scopoli, 1769)                                  | Nandurbar district of Maharashtra                                                                          | Wings   | Stomach trouble    | Babies with stomach trouble are exposed to smoke of wings.                                    |  | Patil (2003)              |
| 11. | Mammal       | Bison               | <i>Bison bison</i> (Linnaeus, 1758)                               | Chhattishgadh                                                                                              | Excreta | Gastric troubles,  | Half teaspoonful of excreta is recommended with a glass of hot milk before sleep till relief. |  | Oodhia (2003 b)           |
| 12. | Mammal       | Cattle              | <i>Bos taurus</i> (Linnaeus, 1758)<br><i>Synonym- Bos indicus</i> | Shoka tribe of Uttaranchal                                                                                 | Bile    | Carminative        | Gorocana or solidified cattle bile is cold in potency, use as carminative.                    |  | Negi and palyal (2007)    |
| 13. | Mammal       | Camel               | <i>Camelus</i>                                                    | Kachchh                                                                                                    | Dung    | Constipation       | The dried dung is burnt and ash is                                                            |  | Gupta Leena et            |

|     |        |             |                                                                              |                                                                                                                    |           |                                           |                                                                                                                                                      |                                           |
|-----|--------|-------------|------------------------------------------------------------------------------|--------------------------------------------------------------------------------------------------------------------|-----------|-------------------------------------------|------------------------------------------------------------------------------------------------------------------------------------------------------|-------------------------------------------|
|     |        |             | dromedarius (Linnaeus, 1758)                                                 |                                                                                                                    |           |                                           | applied externally on stomach for treating constipation.                                                                                             | al (2003)                                 |
| 14. | Mammal | Jackal      | <i>Canis aureus</i> (Linnaeus, 1758)                                         | Maharashtra                                                                                                        | Legs      | Vomiting and dysentery                    | Smoke of legs is used for the cure of vomiting and dysentery.                                                                                        | Patil (2003)                              |
| 15. | Mammal | Goat        | <i>Capra sibirica</i> (Pallas, 1776)                                         | Ao, Angami, Sema, Khamniungan, Chakhesang, Lotha, Zeliang, Sangtam, Pochury, Konyak and Rengma tribes of Nagaland. | Urine     | Stomach disorder                          | Drunk directly.                                                                                                                                      | Kakati et al (2006), Jamir and Lal (2005) |
| 16. | Mammal | Goat        | <i>Capra sibirica</i> (Pallas, 1776)                                         | Ao Tribe of Nagaland                                                                                               | Liver     | Jaundice                                  | Cooked and eaten.                                                                                                                                    | Kakati et al (2006)                       |
| 17. | Mammal | Goat        | <i>Capra sibirica</i> (Pallas, 1776)                                         | Ao, Angami, Sema, Khamniungan, Chakhesang, Lotha, Zeliang, Sangtam, Pochury, Konyak and Rengma tribes of Nagaland. | Urine     | Jaundice and other liver related problems | Urine is taken to cure stomachache. Also cures jaundice and other liver related problems.                                                            | Jamir and Lal (2005)                      |
| 18. | Mammal | Indian ass  | <i>Equus hemionus</i> (Pallas, 1775)<br><i>Equus asinus</i> (Linnaeus, 1758) | Mogya, Bawaria, Meena tribe of Rajasthan                                                                           | Dung      | Jaundice                                  | Dung kept in water and after one day filtered water is given to cure jaundice.                                                                       | Mahawar and Jaroli (2006)                 |
| 19. | Mammal | porcupine   | <i>Hystrix indica</i> (Kerr, 1792)                                           | Bhil, Garasia, Kathodia of Rajasthan                                                                               | Faeces    | Gastric trouble                           | Faeces are given with water as pellet to infants.                                                                                                    | Sharma (2002)                             |
| 20. | Mammal | Porcupine   | <i>Hystrix indica</i> (Kerr, 1792)                                           | Ao Tribe of Nagaland                                                                                               | Bile      | Dysentery                                 | Soaked in rice, dried and taken.                                                                                                                     | Kakati et al (2006)                       |
| 21. | Mammal | Porcupine   | <i>Hystrix indica</i> (Kerr, 1792)                                           | Ao, Angami, Sema, Khamniungan, Lotha, Sangtam and Rengma tribes of Nagaland.                                       | Intestine | Cholera, dysentery and stomach disorders  | A small portion of intestine is dried and then dipped overnight in cold water. This water is drunk to cure cholera, dysentery and stomach disorders. | Jamir and Lal (2005)                      |
| 22. | Mammal | Indian Hare | <i>Lepus nigricollis</i> (F. Cuvier, 1823)                                   | Nandurbar district of Maharashtra                                                                                  | Droppin g | Piles                                     | The smoke of dropping is used for piles. Cattle suffering from foot and mouth disease are exposed to the smoke of legs.                              | Patil (2003)                              |
| 23. | Mammal | Monkey      | <i>Macaca</i> (All species)                                                  | Ao, Angami, Sema, Khamniungan, Lotha,                                                                              | Meat      | Stomach disorder                          | Meat of all monkey species is eaten by Naga tribes. It is general belief                                                                             | Jamir and Lal (2005)                      |

|     |        |            |                                               |                                                                  |                 |                  |                                                                                                                                                                                                              |                        |
|-----|--------|------------|-----------------------------------------------|------------------------------------------------------------------|-----------------|------------------|--------------------------------------------------------------------------------------------------------------------------------------------------------------------------------------------------------------|------------------------|
|     |        |            | <i>Macaca mulatta</i><br>(Zimmermann, 1780)   | Zeliang, Sangtam, Pochury, Konyak and Rengma tribes of Nagaland. |                 |                  | that monkey meat cures stomach disorder.                                                                                                                                                                     |                        |
| 24. | Mammal | Bharal     | <i>Pseudois nayaur</i><br>(Hodgson, 1833)     | Shoka tribe of Uttaranchal                                       | Antlers         | Stomach pain     | Antlers are rubbed to produce a paste, which is either drunk or applied on the stomach to get relieved of stomach pain or fever.                                                                             | Negi and palyal (2007) |
| 25. | Mammal | Flying Fox | <i>Pteropus giganteus</i><br>(Brünnich, 1782) | Nandurbar district of Maharashtra                                | Bone            | Stomach problems | The bone of bat is heated and applied to belly for stomach problems in infants. Droppings are fed to persons addicted to liquor.                                                                             | Patil (2003)           |
| 26. | Mammal | Rat        | <i>Rattus rattus</i><br>(Linnaeus, 1758)      | Chhattishgadh                                                    | Excreta (dried) | Bleeding pile,   | The rat excreta (dried) is recommended with the fresh juice of Kukronda ( <i>Blumea lacera</i> ) leaves externally. Patients are advised to put this mixture inside the anus for quick and permanent relief. | Oodhia (2003 b)        |

**Table 3- Animals and their products used in human diverse kind of pains in India.**

| S. No. |              | English Name | Scientific Name                                                       | Tribe/ Inhabitant/ Region        | Parts uses | Disease         | Method of preparation and medicinal use                                                                                                     | Related reported author in India |
|--------|--------------|--------------|-----------------------------------------------------------------------|----------------------------------|------------|-----------------|---------------------------------------------------------------------------------------------------------------------------------------------|----------------------------------|
| 1.     | Invertebrate | Honey bee    | <i>Apis cerana indica</i> (Fabricius 1798)                            | Tirunelveli district, Tamil Nadu | Wax        | Rheumatic pain. | Applied externally.                                                                                                                         | Ranjit Singh et al (2004)        |
| 2.     | Invertebrate | Honey bee    | <i>Apis dorsata</i> (Fabricius, 1793)                                 | Tirunelveli district, Tamil Nadu | Wax        | Rheumatic pain. | Applied externally.                                                                                                                         | Ranjit Singh et al (2004)        |
| 3.     | Invertebrate | Honey bee    | <i>Apis florea</i> (Fabricius, 1787)                                  | Tirunelveli district, Tamil Nadu | Wax        | Rheumatic pain. | Applied externally.                                                                                                                         | Ranjit Singh et al (2004)        |
| 4.     | Invertebrate | Lac insect   | <i>Kerria lacca</i> (Kerr, 1782)<br>Synonym-<br><i>Laccifer lacca</i> | Tirunelveli district, Tamil Nadu | shellac    | Rheumatism      | Powdered shellac is mixed with honey and is used as remedy for caries. " <i>Lakshadi Thaila</i> ", used to bring down chronic fevers and to | Ranjit Singh et al (2004)        |



|     |              |                     |                                                                                          |                                                                                                                    |                            |                                            |                                                                                                                             |                                   |
|-----|--------------|---------------------|------------------------------------------------------------------------------------------|--------------------------------------------------------------------------------------------------------------------|----------------------------|--------------------------------------------|-----------------------------------------------------------------------------------------------------------------------------|-----------------------------------|
|     |              |                     |                                                                                          |                                                                                                                    |                            |                                            | cure rheumatism has shellac as its main ingredient.                                                                         |                                   |
| 5.  | Invertebrate | Scorpion            | <i>Heterometrus swammerdami</i> (Simon, 1872)<br>Synonym - <i>Palamnaeus swammerdami</i> | Ao, Angami, Sema, Khamniungan, Chakhesang, Lotha, Zeliang, Sangtam, Konyak tribes of Nagaland.                     | whole body                 | Rheumatic joints pain                      | The whole body is boiled in mustard oil and the extract so prepared is used for massaging to relieve rheumatic joints pain. | Jamir and Lal (2005)              |
| 6.  | Pisces       | Channa              | <i>Channa punctata</i> (Bloch, 1793)<br>Synonym- <i>Channa punctatus</i> Linn.           | Dibrugarh District, Assam                                                                                          | Edible portion of the fish | Body pain                                  | Curry prepared from fishes.                                                                                                 | Kalita (2005)                     |
| 7.  | Pisces       | Hammer head shark   | <i>Eusphya blochii</i> (Cuvier, 1816)<br>Synonym- <i>Zygaena blochii</i>                 | Kachchh                                                                                                            | Fat                        | Joints pain                                | Fat is applied externally for treating joints pain.                                                                         | Gupta Leena et al (2003)          |
| 8.  | Amphibia     | Frog                | <i>Fejervarya limnocharis</i><br>synonym- <i>Lymnonecties limnorcharis</i>               | Ao, Angami, Sema, Khamniungan, Chakhesang, Lotha, Zeliang, Sangtam, Pochury, Konyak and Rengma tribes of Nagaland. | Fat                        | Rheumatic-joints pain                      | Fat is used for massaging rheumatic-joints to relieve pain.                                                                 | Jamir and Lal (2005)              |
| 9.  | Reptile      | Cobra               | <i>Naja naja</i> (Linnaeus, 1758)                                                        | Ao, Sema, Khamniungan, Chakhesang, Lotha, Zeliang, Sangtam, Pochury, Konyak tribes of Nagaland.                    | Fat                        | Body ache, rheumatic and burn wounds pain  | Fat is applied to relieve body ache, rheumatic and burn wounds pain and also for rapid healing of fractured bones           | Jamir and Lal (2005)              |
| 10. | Reptile      | Python              | <i>Python reticulatus</i> (Schneider, 1801)                                              | Ao, Angami, Sema, Khamniungan, Chakhesang, Zeliang, Sangtam, Pochury, Konyak and Rengma tribes of Nagaland.        | Fat                        | Body ache, rheumatic, and burn wounds pain | Fat is applied to relieve body ache, rheumatic, and burn wounds pain.                                                       | Jamir and Lal (2005)              |
| 11. | Reptile      | Spiny tailed lizard | <i>Uromastix hardwickii</i> (Gray, 1827)                                                 | Kachchh                                                                                                            | Whole body                 | Joint pain, Rheumatism                     | The whole animal is boiled in oil and the oil applied externally.                                                           | Gupta Leena et al (2003)          |
| 12. | Reptile      | Monitor             | <i>Varanus bengalensis</i> (Daudin, 1758)                                                | Ao Tribe of Nagaland Nandurbar district of Maharashtra                                                             | Fat                        | Rheumatism, Body pain, Piles,              | The fat (oil) of this lizard is used for pain.                                                                              | Kakati et al (2006), Patil (2003) |

|     |         |               |                                                                     |                                                                                                                         |                    |                                  |                                                                                                                                                                                                                                                                                                                          |                                           |
|-----|---------|---------------|---------------------------------------------------------------------|-------------------------------------------------------------------------------------------------------------------------|--------------------|----------------------------------|--------------------------------------------------------------------------------------------------------------------------------------------------------------------------------------------------------------------------------------------------------------------------------------------------------------------------|-------------------------------------------|
| 13. | Reptile | Monitor       | <i>Varanus salvator (Laurenti, 1768)</i>                            | all the Tamilnadu tribes except Toda                                                                                    | flesh              | Arthritis,                       | One kg of the meat along with the skeleton of the monitor is mixed together with 3 liter of coconut milk and boiled for 48 hrs until the meat is completely dissolved. After removing the bones from the medium 50g of ganja leaf ( <i>Cannabis sativa</i> ) is added to the preparation and boiled until it solidifies. | Solavan et al (2004)                      |
| 14. | Aves    | Crow-pheasant | <i>Centropus sinensis (Stephens, 1815)</i>                          | Ao, Angami, Sema, Khamniungan, Chakhesang, Lotha, Zeliang, Sangtam, Pochury, Konyak and Rengma tribes of Nagaland.      | Flesh              | Bodyache and Rheumatic pain      | Flesh is eaten as food to cure bodyache and rheumatic pain.                                                                                                                                                                                                                                                              | Jamir and Lal (2005)                      |
| 15. | Aves    | Hen           | <i>Gallus gallus domesticus</i>                                     | Kachchh                                                                                                                 | Blood              | Body pain<br><br>Arthritis       | Blood is externally massaged on the aching parts of body.<br><br>Blood is applied externally for healing arthritis                                                                                                                                                                                                       | Gupta Leena et al (2003)                  |
| 16. | Mammal  | Bison         | Bison bison (Linnaeus, 1758)                                        | Chhattishgadh                                                                                                           | Excreta            | Internal injury with severe pain | Excreta are given to patient with water.                                                                                                                                                                                                                                                                                 | Oodhia (2003 b)                           |
| 17. | Mammal  | Mithun        | <i>Bos gaurus (H. Smith, 1827)</i><br>Synonym- <i>Bos frontalis</i> | Ao, Angami, Sema, Khamniungan, Chakhesang, Lotha, Zeliang, Sangtam, Yimchunger, Pochury, and Rengma tribes of Nagaland. | Male organ (Penis) | Breast pain of lactating mother  | Male organ is cooked and eaten to relieve severe pain in breast of lactating mother.                                                                                                                                                                                                                                     | Jamir and Lal (2005), Kakati et al (2006) |
| 18. | Mammal  | Cow           | <i>Bos taurus (Linnaeus, 1758)</i><br>Synonym- <i>Bos indicus</i>   | Mogyra, Bawaria, Meena tribe of Rajasthan                                                                               | Dung + Milk        | Muscle pain                      | Muscle pain can relieve by smear of dung and milk mixture.                                                                                                                                                                                                                                                               | Mahawar and Jaroli (2006)                 |
| 19. | Mammal  | Buffalo       | <i>Bubalus bubalis (B. arnee) (Linnaeus, 1758)</i>                  | Ao Tribe of Nagaland                                                                                                    | Fat                | Body pain, Sprain, Rheumatism    | Applied externally as embrocation/massager.                                                                                                                                                                                                                                                                              | Kakati et al (2006)                       |
| 20. | Mammal  | Camel         | <i>Camelus dromedarius (Linnaeus, 1758)</i>                         | Saharia tribe                                                                                                           | Milk               | Muscular pain                    | Used as massage cream in muscular pain.                                                                                                                                                                                                                                                                                  | Mahawar and Jaroli (2007)                 |

|     |        |                    |                                                                                               |                                                                                                                                                                     |               |                                              |                                                                                                            |                                               |
|-----|--------|--------------------|-----------------------------------------------------------------------------------------------|---------------------------------------------------------------------------------------------------------------------------------------------------------------------|---------------|----------------------------------------------|------------------------------------------------------------------------------------------------------------|-----------------------------------------------|
| 21. | Mammal | Jackal             | <i>Canis aureus</i><br>(Linnaeus, 1758)                                                       | Shoka tribe of<br>Uttaranchal                                                                                                                                       | Flesh         | Arthritis                                    | The meat is believed to cure<br>arthritis.                                                                 | Negi and palyal<br>(2007)                     |
| 22. | Mammal | Dog                | <i>Canis lupus<br/>familiaris</i><br>(Linnaeus, 1758)<br>Synonym- <i>Canis<br/>familiaris</i> | Ao, Angami, Sema,<br>Khamniungan,<br>Chakhesang, Lotha,<br>Zeliang, Sangtam,<br>Pochury, Konyak and<br>Rengma tribes of<br>Nagaland.                                | Urine         | Headache                                     | Urine cures is applied on fore head<br>to relieve headache.                                                | Jamir and Lal<br>(2005)                       |
| 23. | Mammal | Goat               | <i>Capra sibirica</i><br>(Pallas, 1776)                                                       | Ao Tribe of Nagaland                                                                                                                                                | Legs          | Sprain, Bone<br>fracture                     | Lower portion of legs cooked.                                                                              | Kakati et al<br>(2006)                        |
| 24. | Mammal | Indian<br>wild ass | <i>Equus hemionus<br/>khur</i> (Lesson,<br>1827)                                              | Kachchh                                                                                                                                                             | Blood         | Arthritis                                    | Blood is massaged externally for<br>healing arthritis                                                      | Gupta Leena et<br>al (2003)                   |
| 25. | Mammal | Cat                | <i>Felis catus</i><br>(Linnaeus, 1758)<br>Synonym- <i>Felis<br/>domesticus</i>                | Shoka tribe of<br>Uttaranchal                                                                                                                                       | Whole<br>body | Arthritis                                    | The whole animal is stripped off and<br>boiled and the resultant juice is said<br>to cure arthritis.       | Negi and palyal<br>(2007)                     |
| 26. | Mammal | Striped<br>Hyena   | <i>Hyaena hyaena</i><br>(Linnaeus, 1758)                                                      | Bhil, Garasia,<br>Kathodia of<br>Rajasthan Kachchh                                                                                                                  | Fat           | Arthritis                                    | Fat is applied externally in massage<br>in arthritis.                                                      | Sharma (2002),<br>Gupta Leena et<br>al (2003) |
| 27. | Mammal | Porcupine          | <i>Hystrix indica</i><br>(Kerr, 1792)                                                         | Ao, Angami, Sema,<br>Khamniungan,<br>Lotha, Sangtam and<br>Rengma tribes of<br>Nagaland.                                                                            | Fat           | Bodyache,<br>rheumatic pain,                 | Fat is applied to relieve bodyache,<br>rheumatic pain.                                                     |                                               |
| 28. | Mammal | Monkey             | <i>Macaca mulatta</i><br>(Zimmermann,<br>1780)                                                | Shoka tribe of<br>Uttaranchal                                                                                                                                       | Flesh         | Rheumatism,                                  | The meat is believed to cure<br>rheumatism.                                                                | Negi and palyal<br>(2007)                     |
| 29. | Mammal | Panther            | <i>Panthera pardus</i><br>(Linnaeus, 1758)                                                    | Bhil, Garasia,<br>Kathodia of<br>Rajasthan and Shoka<br>tribe of Uttaranchal                                                                                        | Fat           | Arthritis<br>body pain                       | Fat is used in massage in arthritis.<br>The fat is used as massaging oil in<br>the treatment of body pain. | Sharma (2002),<br>Negi and palyal<br>(2007)   |
| 30. | Mammal | Tiger              | <i>Panthera tigris</i><br>(Linnaeus, 1758)                                                    | Ao, Angami, Sema,<br>Khamniungan,<br>Chakhesang, Lotha,<br>Zeliang, Sangtam,<br>Pochury, Konyak and<br>Rengma tribes of<br>Nagaland., Bhil,<br>Garasia, Kathodia of | Fat           | Arthritis<br>bodyache and<br>rheumatic pain. | Fat is applied for relieving bodyache<br>and rheumatic pain.                                               | Jamir and Lal<br>(2005), S. K.<br>Sharma      |

|     |        |                  |                                         |                                                               |       |                 |                                                                                                                                     |                                                |
|-----|--------|------------------|-----------------------------------------|---------------------------------------------------------------|-------|-----------------|-------------------------------------------------------------------------------------------------------------------------------------|------------------------------------------------|
|     |        |                  |                                         | Rajasthan                                                     |       |                 |                                                                                                                                     |                                                |
| 31. | Mammal | Sherni (Tigress) | <i>Panthera tigris</i> (Linnaeus, 1758) | Chhattishgadh                                                 | milk  | Pain breasts    | For external application, they massage it on breasts.                                                                               | Oodhia (2003 a)                                |
| 32. | Mammal | Pig              | <i>Sus scrofa domestica</i>             | Mogya, Bawaria, Meena tribe of Rajasthan Ao Tribe of Nagaland | Fat   | Body pain       | Fat of pig is use as massage cream in muscular pain.                                                                                | Mahawar and Jaroli (2006), Kakati et al (2006) |
| 33. | Mammal | Indian Wild boar | <i>Sus scrofa cristatus</i>             | Bhil, Garasia, Kathodia of Rajasthan                          | Blood | Internal pain   | Blood or dry blood powder is mixed with 'mahuri' (local liqure prepare by flower of Madhuca indica) is given to cure internal pain. | Sharma (2002)                                  |
| 34. | Mammal | Indian Wild Boar | <i>Sus scrofa cristatus</i>             | Nandurbar district of Maharashtra                             | oil   | Rheumatic pains | The oil is used for joint (rheumatic) pains.                                                                                        | Patil (2003)                                   |

**Table 4- Animals and their products used in nervous system related problems of India.**

| S. No. |              | English Name    | Scientific Name                             | Tribe/ Inhabitant/ Region                                                    | Parts uses  | Disease           | Method of preparation and medicinal use                                                                                          | Related reported author in India                                 |
|--------|--------------|-----------------|---------------------------------------------|------------------------------------------------------------------------------|-------------|-------------------|----------------------------------------------------------------------------------------------------------------------------------|------------------------------------------------------------------|
| 1.     | Invertebrate | Bed Bug         | <i>Cimex lectularius</i> (Linnaeus, 1758)   | Chhattishgadh                                                                | Whole body  | Epilepsy          |                                                                                                                                  | Oodhia (1995)                                                    |
| 2.     | Invertebrate | Velvet ant      | <i>Dasymutilla occidentalis</i> (Linnaeus)  | Tirunelveli district, Tamil Nadu                                             | Whole body  | Paralysis         | The powder of this ant is mixed with honey and given to patients suffering from paralysis.                                       | Ranjit Singh et al (2004)                                        |
| 3.     | Invertebrate | Pod Borer       | <i>Helicoverpa armigera</i> (Hubner, 1805)  | Chhattishgadh                                                                | Caterpillar | Nervous breakdown | Villagers use powder (after drying and crushing) of caterpillars as a tonic.                                                     | Oodhia (1995)                                                    |
| 4.     | Invertebrate | Red Velvet Mite | <i>Trombidium grandissimum</i> (Koch, 1867) | Chhattishgadh                                                                | Whole body  | Paralysis         |                                                                                                                                  | Oodhia (1995)                                                    |
| 5.     | Aves         | pigeon          | <i>Columba livia</i> (Gmelin, 1789)         | most of the Tamilnadu tribes                                                 | Blood       | Epilepsy          | Fresh blood of the pigeon is applied on the skin from head to foot thrice a week. The blood should remain on the skin for 6 hrs. | Solavan et al (2004)                                             |
| 6.     | Aves         | Pigeon          | <i>Columba livia</i> (Gmelin, 1789)         | Bhil, Garasia, Kathodia, Saharia of Rajasthan and Shoka tribe of Uttaranchal | Flesh       | Paralysis         | Flesh is eaten to cure Paralysis.                                                                                                | Sharma (2002), Negi and palyal (2007), Mahawar and Jaroli (2007) |

|     |        |                                      |                                                         |                                                                                                                                      |                |                                   |                                                                                                                                                                                                            |                                                                                                 |
|-----|--------|--------------------------------------|---------------------------------------------------------|--------------------------------------------------------------------------------------------------------------------------------------|----------------|-----------------------------------|------------------------------------------------------------------------------------------------------------------------------------------------------------------------------------------------------------|-------------------------------------------------------------------------------------------------|
| 7.  | Aves   | Pigeon                               | <i>Columba livia</i><br>(Gmelin, 1789)                  | Mogya, Bawaria,<br>Meena, Saharia tribe<br>of Rajasthan<br>most of the<br>Tamilnadu tribes<br>Kachchh                                | blood<br>fresh | Paralysis                         | The fresh blood is massaged<br>externally to treat paralysis.<br>Fresh blood of the pigeon is applied<br>on the skin from head to foot thrice<br>a week. The blood should remain on<br>the skin for 6 hrs. | Mahawar and<br>Jaroli (2006)<br>(2007), Solavan<br>et al (2004),<br>Gupta Leena et al<br>(2003) |
| 8.  | Aves   | Pigeon                               | <i>Columba livia</i><br>(Gmelin, 1789)                  | Chhattishgadh                                                                                                                        | Excreta        | Migraine                          | Excreta of pigeon in combination<br>with mustard seed for external<br>application.                                                                                                                         | Oodhia (2003 b)                                                                                 |
| 9.  | Aves   | Crow                                 | <i>Corvus<br/>splendens</i><br>(Vieillot, 1817)         | Ao Tribe of Nagaland                                                                                                                 | Flesh          | Paralysis                         | Cooked and eaten.                                                                                                                                                                                          | Kakati et al<br>(2006)                                                                          |
| 10. | Mammal | Jackal                               | <i>Canis aureus</i><br>(Linnaeus, 1758)                 | Shoka tribe of<br>Uttaranchal                                                                                                        | Flesh          | Paralysis                         | The meat is believed to cure<br>paralysis.                                                                                                                                                                 | Negi and palyal<br>(2007)                                                                       |
| 11. | Mammal | Goat                                 | <i>Capra sibirica</i><br>(Pallas, 1776)                 | Ao, Angami, Sema,<br>Khamniungan,<br>Chakhesang, Lotha,<br>Zeliang, Sangtam,<br>Pochury, Konyak and<br>Rengma tribes of<br>Nagaland. | Urine          | Paralysis<br>disorder             | Drunk directly.                                                                                                                                                                                            | Kakati et al<br>(2006),<br>Jamir and Lal<br>(2005)                                              |
| 12. | Mammal | Five-<br>Striped<br>Palm<br>Squirrel | <i>Funambulus<br/>pennantii</i><br>(Wroughton,<br>1905) | Bhil, Garasia,<br>Kathodia of<br>Rajasthan                                                                                           | Flesh          | Epilepsy                          | Flesh is eaten to cure epilepsy.                                                                                                                                                                           | Sharma (2002)                                                                                   |
| 13. | Mammal | Striped<br>Hyena                     | <i>Hyaena hyaena</i><br>(Linnaeus, 1758)                | Nandurbar district of<br>Maharashtra                                                                                                 | Brain          | Epilepsy                          | Brain mixed with wheat flour is used<br>to cure epilepsy.                                                                                                                                                  | Patil (2003)                                                                                    |
| 14. | Mammal | Rhesus<br>Macaque                    | <i>Macaca mulatta</i><br>(Zimmermann,<br>1780)          | Bhil, Garasia,<br>Kathodia of<br>Rajasthan                                                                                           | Blood          | Paralysis                         | Blood is given to cure paralysis.                                                                                                                                                                          | Sharma (2002)                                                                                   |
| 15. | Mammal | Black ibis                           | <i>Pseudibis<br/>papillosa</i><br>(Temminck,<br>1824)   | Kachchh                                                                                                                              | Blood          | Nervous<br>disorder,<br>paralysis | Blood is massaged for curing<br>nervous disorder, paralysis and<br>inherent body heat.                                                                                                                     | Gupta Leena et al<br>(2003)                                                                     |

**Table 5- Animals and their products used in General weakness in India**

| S.N. |              | English Name | Scientific Name                                                             | Tribe/ Inhabitant/ Region                                                                              | Parts uses  | Disease                  | Method of preparation and medicinal use                                                                                                                                                                                          | Related reported author in India          |
|------|--------------|--------------|-----------------------------------------------------------------------------|--------------------------------------------------------------------------------------------------------|-------------|--------------------------|----------------------------------------------------------------------------------------------------------------------------------------------------------------------------------------------------------------------------------|-------------------------------------------|
| 1.   | Invertebrate | Silkworm     | <i>Bombyx mori</i> (Linnaeus)                                               | Tirunelveli district, Tamil Nadu                                                                       | Larvae      | Nutrient food            | After boiling, the killed larvae are taken as nutrient food by some local people.                                                                                                                                                | Ranjit Singh et al (2004)                 |
| 2.   | Invertebrate | Ant          | <i>Dorylus labiatus</i> (Shuckard, 1840)                                    | Tirunelveli district, Tamil Nadu                                                                       | Whole body  | Good health              | These ants are collected, put into honey and after a fortnight the honey is taken to strengthen nervous system and to restore good health.                                                                                       | Ranjit Singh et al (2004)                 |
| 3.   | Invertebrate | Pod Borer    | <i>Helicoverpa armigera</i> (Hubner, 1805)                                  | Chhattishgadh                                                                                          | Caterpillar | Fever, general weakness, | Villagers use powder (after drying and crushing) of caterpillars as a tonic. They generally apply the fresh extracts of caterpillars on injured parts of the body to stop bleeding as a first aid measure.                       | Oodhia (1995)                             |
| 4.   | Pisces       | Eel          | <i>Amphipnous cuchia</i> (Hamilton, 1822).                                  | Ao Tribe of Nagaland                                                                                   | Blood       | General weakness         | Fresh blood is drunk.                                                                                                                                                                                                            | Kakati et al (2006)                       |
| 5.   | Pisces       | Eel Fish     | <i>Monopterus albus</i> (Zuiew, 1793)<br>Monopterus cuchia (Hamilton, 1822) | Ao, Angami, Sema, Khamniungan, Lotha, Zeliang, Sangtam, Pochury, Konyak and Rengma tribes of Nagaland. | Blood       | General weakness, anemia | Fresh blood is drunk to cure general weakness and to relieve anemia.                                                                                                                                                             | Jamir and Lal (2005)                      |
| 6.   | Aves         | Pigeon       | <i>Columba livia</i> (Gmelin, 1789).                                        | Ao, Angami, Sema, Khamniungan, Lotha, Zeliang, Pochury tribes of Nagaland.                             | Flesh       | General weakness         | Flesh of Young birds is cooked and eaten for early recovery.                                                                                                                                                                     | Kakati et al (2006), Jamir and Lal (2005) |
| 7.   | Aves         | Crow         | <i>Corvus splendens</i> (Vieillot, 1817)                                    | Palliyan, Irular and Sholaga tribes                                                                    | Flesh       | Anemia                   | The flesh is cooked along with the seeds of the <i>Piper nigrum</i> and <i>Piper longum</i> ; stem of ginger <i>Zingiber officinale</i> ; root of <i>Allium sativum</i> ; ghee of cow and the natural honey to make a 'legheum.' | Solavan et al (2004)                      |

|     |        |                              |                                                                         |                                                                                                                     |       |                  |                                                                                                                                                                                                                                  |                           |
|-----|--------|------------------------------|-------------------------------------------------------------------------|---------------------------------------------------------------------------------------------------------------------|-------|------------------|----------------------------------------------------------------------------------------------------------------------------------------------------------------------------------------------------------------------------------|---------------------------|
| 8.  | Aves   | house sparrow                | <i>Passer domesticus</i> (Linnaeus, 1758)                               | Kanikaran, Irular and Kurimba tribes                                                                                | Flesh | Anemia           | The flesh is cooked along with the seeds of the <i>Piper nigrum</i> and <i>Piper longum</i> ; stem of ginger <i>Zingiber officinale</i> ; root of <i>Allium sativum</i> ; ghee of cow and the natural honey to make a 'legheum'. | Solavan et al (2004)      |
| 9.  | Mammal | Cow                          | <i>Bos taurus</i> (Linnaeus, 1758)<br>Synonym- <i>Bos indicus</i>       | Mogya, Bawaria, Meena tribe of Rajasthan                                                                            | Urine | Weakness         | Weakness due to fever is cure by drinking urine.                                                                                                                                                                                 | Mahawar and Jaroli (2006) |
| 10. | Mammal | Goat                         | <i>Capra sibirica</i> (Pallas, 1776)                                    | Ao Tribe of Nagaland                                                                                                | Milk  | General Weakness | Drunk directly.                                                                                                                                                                                                                  | Kakati et al (2006)       |
| 11. | Mammal | Goat                         | <i>Capra sibirica</i> (Pallas, 1776)                                    | Ao, Angami, Sema, Khiamniungan, Chakhesang, Lotha, Zeliang, Sangtam, Pochury, Konyak and Rengma tribes of Nagaland. | Milk  | Weakness         | Milk is drunk to avoid weakness.                                                                                                                                                                                                 | Jamir and Lal (2005)      |
| 12. | Mammal | Monkey                       | <i>Macaca</i> (All species)<br><i>Macaca mulatta</i> (Zimmermann, 1780) | Ao, Angami, Sema, Khiamniungan, Lotha, Zeliang, Sangtam, Pochury, Konyak and Rengma tribes of Nagaland.             | Meat  | General weakness | Meat of all monkey species is eaten by Naga tribes. It is general belief that monkey meat cures general weakness.                                                                                                                | Jamir and Lal (2005)      |
| 13. | Mammal | Common Palm Civet, Toddy Cat | <i>Paradoxurus hermaphroditus</i> (Pallas, 1777)                        | Nandurbar district of Maharashtra                                                                                   | Meat  | Weakness         | Meat is used for feeding weak cattle.                                                                                                                                                                                            | Patil (2003)              |

**Table 6- Animals and their products used in urinary problems in India.**

| S. N. |              | Name English | Scientific Name                           | Tribe/ Inhabitant/ Region | Parts uses | Disease           | Method of preparation and medicinal use                      | Related reported author in India |
|-------|--------------|--------------|-------------------------------------------|---------------------------|------------|-------------------|--------------------------------------------------------------|----------------------------------|
| 1.    | Invertebrate | Bed Bug      | <i>Cimex lectularius</i> (Linnaeus, 1758) | Chhattishgadh             | Whole body | Urinary disorders | Application inside the urethra (in case of urine retention). | Oodhia (1995)                    |
| 2.    | Invertebrate | Red          | <i>Trombidium</i>                         | Chhattishgadh             | Whole      | Urinogenital      |                                                              | Oodhia (1995)                    |

|    |         |             |                                                                                             |                            |                    |                      |                                                                                                          |                           |
|----|---------|-------------|---------------------------------------------------------------------------------------------|----------------------------|--------------------|----------------------|----------------------------------------------------------------------------------------------------------|---------------------------|
|    |         | Velvet Mite | <i>grandissimum</i><br>(Koch, 1867)                                                         |                            | body               | disorders            |                                                                                                          |                           |
| 3. | Pisces  | Labeo       | <i>Labeo rohita</i><br>(Hamilton, 1822)                                                     | Saharia tribe              | Cervical vertebrae | Urine Problem        | A fish cervical vertebra is rubbed with water and this essence water is taken in urine blockage problem. | Mahawar and Jaroli (2007) |
| 4. | Reptile | Snakes      | <i>Gloydius himalayanus</i><br>(Günther, 1864)<br>Synonym-<br><i>Ancistrodon himalayans</i> | Shoka tribe of Uttaranchal | Flesh              | Elimination of urine | The meat is believed to facilitate the elimination of urine, stool and flatus.                           | Negi and palyal (2007)    |
| 5. | Reptile | Snakes      | <i>Ptyas mucosus</i><br>(Linnaeus, 1758)                                                    | Shoka tribe of Uttaranchal | Flesh              | Elimination of urine | The meat is believed to facilitate the elimination of urine, stool and flatus.                           | Negi and palyal (2007)    |
| 6. | Reptile | Snakes      | <i>Daboia russelii</i><br>(Shaw & Nodder, 1797)<br>Synonym- <i>Vipera russelli</i>          | Shoka tribe of Uttaranchal | Flesh              | Elimination of urine | The meat is believed to facilitate the elimination of urine, stool and flatus.                           | Negi and palyal (2007)    |
| 7. | Aves    | Pigeon      | <i>Columba livia</i><br>(Gmelin, 1789)                                                      | Chhattishgadh              | Excreta            | Kidney stones        | The use of excreta with sugar is very effective in order to drain away the kidney stones.                | Oodhia (2003 b)           |
| 8. | mammal  | Cow         | <i>Bos taurus</i><br>(Linnaeus, 1758)<br>Synonym- <i>Bos indicus</i>                        | Kachchh                    | Dung               | Urticaria            | The dried dung is burnt and ash is applied externally to treat urticaria.                                | Gupta Leena et al (2003)  |

**Table 7- Animals and their products used in impotency, aphrodisiac and birth control in India.**

| S.N. |      | Name English   | Scientific Name                               | Tribe/ Inhabitant/ Region  | Parts uses | Disease             | Method of preparation and medicinal use                      | Related reported author in India |
|------|------|----------------|-----------------------------------------------|----------------------------|------------|---------------------|--------------------------------------------------------------|----------------------------------|
| 1.   | Aves | Chir pheasant  | <i>Catreus wallichii</i><br>(Hardwicke, 1827) | Shoka tribe of Uttaranchal | Flesh      | Strength and semen. | The meat is believed to be a promoter of strength and semen. | Negi and palyal (2007)           |
| 2.   | Aves | Indian Peafowl | <i>Pavo cristatus</i><br>(Linnaeus, 1758)     | Saharia tribe              | Feather    | Infertility         | Rounded spots of feather mix with Jaggery.                   | Mahawar and Jaroli (2007)        |
| 3.   | Aves | Peacock        | <i>Pavo cristatus</i>                         | Ao, Angami, Sema,          | Flesh      | Aphrodisiac         | Flesh is cooked and eaten as an                              | Jamir and Lal                    |



|     |        |                |                                                                                    |                                                                                                                     |            |                                            |                                                                                                                                                          |                           |
|-----|--------|----------------|------------------------------------------------------------------------------------|---------------------------------------------------------------------------------------------------------------------|------------|--------------------------------------------|----------------------------------------------------------------------------------------------------------------------------------------------------------|---------------------------|
|     |        |                | (Linnaeus, 1758)                                                                   | Khiamniungan, Lotha, Zeliang, Konyak tribes of Nagaland                                                             |            |                                            | aphrodisiac.                                                                                                                                             | (2005)                    |
| 4.  | Aves   | Collared dove  | <i>Streptopelia decaocto</i> (Frivaldszky, 1838)                                   | Mogya, Bawaria, Meena tribe of Rajasthan                                                                            | Flesh      | To attain early puberty                    | To attain early puberty girls eat flesh of collared dove.                                                                                                | Mahawar and Jaroli (2006) |
| 5.  | Aves   | Owl            | <i>Strix aluco niviculum</i> (Blyth, 1845)                                         | Shoka tribe of Uttaranchal                                                                                          | Flesh      | Strength and virility                      | The meat is believed to be a promoter of strength and virility.                                                                                          | Negi and palyal (2007)    |
| 6.  | Mammal | Cow            | <i>Bos taurus</i> (Linnaeus, 1758)<br>Synonym- <i>Bos indicus</i>                  | Chhattishgadh                                                                                                       | milk       | Good sexual health                         | Teaspoonful of Musli root powder with a glass of cow milk daily in order to maintain the sexual health.                                                  | Oodhia (2003 a)           |
| 7.  | Mammal | Dog            | <i>Canis lupus familiaris</i> (Linnaeus, 1758)<br>Synonym- <i>Canis familiaris</i> | Ao, Angami, Sema, Khiamniungan, Chakhesang, Lotha, Zeliang, Sangtam, Pochury, Konyak and Rengma tribes of Nagaland. | Flesh      | Male Impotency, pre and post-partum health | Flesh soup improves pre and post-partum health. Flesh soup cures male Impotency.                                                                         | Jamir and Lal (2005)      |
| 8.  | Mammal | Elephant       | <i>Elephas maximus indicus</i> (Cuvier, 1798)                                      | Chhattishgadh                                                                                                       | Excreta    | Birth control measure                      | Female patient to put a piece of elephant excreta inside the vagina in order to prevent pregnancy.                                                       | Oodhia (2003 b)           |
| 9.  | Mammal | Donkey         | <i>Equus hemionus</i> (Pallas, 1775)                                               | Chhattishgadh                                                                                                       | Excreta    | Sexual desire and efficacy                 | The use of the excreta to increase the sexual desire and efficacy.                                                                                       | Oodhia (2003 b)           |
| 10. | Mammal | Horse          | <i>Equus caballus</i> (Linnaeus, 1758)                                             | Shoka tribe of Uttaranchal                                                                                          | Flesh      | Corpulence, strength                       | Meat is believed to be a promoter of corpulence, strength.                                                                                               | Negi and palyal (2007)    |
| 11. | Mammal | Himalayan Thar | <i>Hemitragus jemlahicus</i> (H. Smith, 1826)                                      | Shoka tribe of Uttaranchal                                                                                          | Flesh      | Strength and virility                      | The meat is believed to be a promoter of strength and virility (usually that of the tail).                                                               | Negi and palyal (2007)    |
| 12. | Mammal | Sloth Bear     | <i>Melursus ursinus</i> (Shaw, 1791)                                               | Nandurbar district of Maharashtra                                                                                   | Sex organs | Aphrodisiac                                | The sex organs are used as aphrodisiac. The hair is used for prevention of fear in infants. Tail is hanged on front door to protect the house from evil. | Patil (2003)              |
| 13. | Mammal | Barking deer   | <i>Muntiacus muntjak</i> (Zimmermann, 1780)                                        | Shoka tribe of Uttaranchal                                                                                          | Flesh      | Strength and virility                      | The meat is believed to be a promoter of strength and virility and is a good cardiac tonic.                                                              | Negi and palyal (2007)    |
| 14. | Mammal | Bat            | <i>Myotis lucifugus</i> (LeConte, 1831)                                            | Ao, Angami, Sema, Khiamniungan,                                                                                     | Flesh      | Male impotency                             | Flesh is cooked and eaten for curing male impotency.                                                                                                     | Jamir and Lal (2005)      |

|     |        |           |                                         |                                                                            |         |                                                                            |                                                                                                                                                                                                           |                        |
|-----|--------|-----------|-----------------------------------------|----------------------------------------------------------------------------|---------|----------------------------------------------------------------------------|-----------------------------------------------------------------------------------------------------------------------------------------------------------------------------------------------------------|------------------------|
|     |        |           |                                         | Chakhesang, Lotha, Zeliang, Pochury, Konyak and Rengma tribes of Nagaland. |         |                                                                            |                                                                                                                                                                                                           |                        |
| 15. | Mammal | Leopard   | <i>Panthera pardus</i> (Linnaeus, 1758) | Shoka tribe of Uttaranchal                                                 | Bones   | Aphrodisiac                                                                | The bones are Supposed to be an aphrodisiac.                                                                                                                                                              | Negi and palyal (2007) |
| 16. | Mammal | Leopard   | <i>Panthera pardus</i> (Linnaeus, 1758) | Shoka tribe of Uttaranchal                                                 | Flesh   | Strength and virility                                                      | The meat is believed to be a promoter of strength and virility.                                                                                                                                           | Negi and palyal (2007) |
| 17. | Mammal | Rat       | <i>Rattus rattus</i> (Linnaeus, 1758)   | Shoka tribe of Uttaranchal                                                 | Flesh   | Promoter of semen                                                          | The meat is believed to be a promoter of semen.                                                                                                                                                           | Negi and palyal (2007) |
| 18. | Mammal | Rat       | <i>Rattus rattus</i> (Linnaeus, 1758)   | Chhattishgadh                                                              | Excreta | Birth control measure,                                                     | The traditional healers advise the women to put the rat excreta mixed with honey and the fresh leaf juice of Mucuna leaves inside the vagina.                                                             | Oodhia (2003 b)        |
| 19. | Mammal | Rat       | <i>Rattus rattus</i> (Linnaeus, 1758)   | Chhattishgadh                                                              | Excreta | Increase your sexual desire and efficacy                                   | Dried excreta (not sun dried; dried in shady places) is mixed with any one of these liquids (water, milk Mahua liquor, honey , etc.) and applied on male genital just before intercourse. The liquids are | Oodhia (2003 b)        |
| 20. | Mammal | Wild Boar | <i>Sus scrofa cristatus</i>             | Shoka tribe of Uttaranchal                                                 | Flesh   | Strength, corpulence and virility good appetizer and alleviator of fatigue | The meat is believed to be a promoter of strength, corpulence and virility, is a good appetizer and alleviator of fatigue.                                                                                | Negi and palyal (2007) |

**Table 8- Animals and their products used in skin problems in India.**

| S. No. |              | English Name | Scientific Name                            | Tribe/ Inhabitant/ Region        | Parts uses | Disease         | Method of preparation and medicinal use | Related reported author in |
|--------|--------------|--------------|--------------------------------------------|----------------------------------|------------|-----------------|-----------------------------------------|----------------------------|
| 1.     | Invertebrate | Honey bee    | <i>Apis cerana indica</i> (Fabricius 1798) | Tirunelveli district, Tamil Nadu | Honey      | Skin abrasions, | Applied externally.                     | Ranjit Singh et al (2004)  |
| 2.     | Invertebrate | Honey bee    | <i>Apis cerana</i> <i>Apis dorsata</i>     | Tirunelveli district, Tamil Nadu | Honey      | Skin abrasions, | Applied externally.                     | Ranjit Singh et al (2004)  |

|     |              |                        |                                                                     |                                                                                                                         |                |                                                  |                                                                                                                                                                          |                                           |
|-----|--------------|------------------------|---------------------------------------------------------------------|-------------------------------------------------------------------------------------------------------------------------|----------------|--------------------------------------------------|--------------------------------------------------------------------------------------------------------------------------------------------------------------------------|-------------------------------------------|
|     |              |                        | (Fabricius, 1793)                                                   |                                                                                                                         |                |                                                  |                                                                                                                                                                          |                                           |
| 3.  | Invertebrate | Honey bee              | <i>Apis florea</i> (Fabricius, 1787)                                | Tirunelveli district, Tamil Nadu                                                                                        | Honey          | Skin abrasions,                                  | Applied externally.                                                                                                                                                      | Ranjit Singh et al (2004)                 |
| 4.  | Invertebrate | Pod Borer              | <i>Helicoverpa armigera</i> (Hubner, 1805)                          | Chhattishgadh                                                                                                           | Caterpillar    | Hair growth                                      | Aqueous extracts of caterpillar to promote hair growth.                                                                                                                  | Oodhia (1995)                             |
| 5.  | Invertebrate | Housefly               | <i>Musca domestica nebulo</i> (Fabricius, 1784)                     | Chhattishgadh                                                                                                           | Whole body     | Dyeing the hair black                            | 100 houseflies and mix them in sesamum oil. After mixing, the oil is kept under open sky in direct sunlight for forty days. Them this oil is used to dye the hair black. | Oodhia (1995)                             |
| 6.  | Invertebrate | Green Leafhopper (GLH) | <i>Nephotettix nigropictus</i> (Stal, 1870)                         | Chhattishgadh                                                                                                           | Whole body     | Skin problems                                    |                                                                                                                                                                          | Oodhia (1995)                             |
| 7.  | Reptile      | Earth Boa              | <i>Eryx johnii</i> (Russell, 1801)                                  | Nandurbar district of Maharashtra                                                                                       | Whole body     | Leucoderma                                       | The oil of earth boa is applied to treat leucoderma.                                                                                                                     | Patil (2003)                              |
| 8.  | Reptile      | python                 | <i>Python reticulatus</i> (Schneider, 1801)                         | Kanikaran, Kattunaikkan and Toda                                                                                        | Fat            | Leprosy                                          | The fat deposits are carefully collected from the gonads and melted in an earthen pot and applied on the affected.                                                       | Solavan et al (2004)                      |
| 9.  | Aves         | Pigeon                 | <i>Columba livia</i> (Gmelin, 1789)                                 | Chhattishgadh                                                                                                           | Excreta        | Skin free from spots and to improve the fairness | Aqueous paste of excreta is best to make the skin free from spots and to improve the fairness.                                                                           | Oodhia (2003 b)                           |
| 10. | Mammal       | Elephant               | <i>Elephas maximus indicus</i> (Cuvier, 1798)                       | Tamilnadu tribes                                                                                                        | tooth and tusk | Pimples                                          | Scatched tooth and tusks are mixed with mother's milk and applied topically on the affected part before going to bed.                                                    | Solavan et al (2004)                      |
| 11. | Mammal       | Mithun                 | <i>Bos gaurus</i> (H. Smith, 1827)<br>Synonym- <i>Bos frontalis</i> | Ao, Angami, Sema, Khamniungan, Chakhesang, Lotha, Zeliang, Sangtam, Yimchunger, Pochury, and Rengma tribes of Nagaland. | Flesh          | Skin diseases                                    | Cooked flesh is applied to cure skin diseases.                                                                                                                           | Jamir and Lal (2005)                      |
| 12. | Mammal       | Goat                   | <i>Capra sibirica</i> (Pallas, 1776)                                | Ao, Angami, Sema, Khamniungan, Lotha, Chakhesang, Zeliang, Sangtam,                                                     | Urine          | Skin disease                                     | Drunk directly.                                                                                                                                                          | Kakati et al (2006), Jamir and Lal (2005) |

|     |        |                  |                                               |                                                                                                                    |                 |                                                     |                                                                                                       |                                           |
|-----|--------|------------------|-----------------------------------------------|--------------------------------------------------------------------------------------------------------------------|-----------------|-----------------------------------------------------|-------------------------------------------------------------------------------------------------------|-------------------------------------------|
|     |        |                  |                                               | Pochury, Konyak and Rengma tribes of Nagaland.                                                                     |                 |                                                     |                                                                                                       |                                           |
| 13. | Mammal | Sambhar          | <i>Cervus unicolor</i> (Kerr, 1792)           | Saharia tribe                                                                                                      | Antler          | Herpes                                              | Antler is rubbed with water this paste is applied in Herpes.                                          | Mahawar and Jaroli (2007)                 |
| 14. | Mammal | Elephant         | <i>Elephas maximus indicus</i> (Cuvier, 1798) | Ao, Angami, Sema, Khamniungan, Chakhesang, Lotha, Zeliang, Sangtam, Pochury, Konyak and Rengma tribes of Nagaland. | Teeth and tusks | Leucoderma, Itching, eczema and ringworm infections | Teeth and tusks are powdered and applied on skin to treat leucoderma, eczema and ringworm infections. | Jamir and Lal (2005), Kakati et al (2006) |
| 15. | Mammal | Human            | <i>Homo sapiens</i> (Linnaeus, 1758)          | Saharia tribe                                                                                                      | Bones           | Herpes                                              | Bone is grounded with water and this paste is applied in Herpes.                                      | Mahawar and Jaroli (2007)                 |
| 16. | Mammal | Indian porcupine | <i>Hystrix indica</i> (Kerr, 1792)            | Bhil, Garasia, Kathodia of Rajasthan                                                                               | Quill           | Leucoderma Scabies                                  | A paste of quill and bone is prepared in water and applied on the white scars.                        | Sharma (2002)                             |
| 17. | Mammal | Indian porcupine | <i>Hystrix indica</i> (Kerr, 1792)            | Bhil, Garasia, Kathodia of Rajasthan                                                                               | Bone            | Leucoderma Scabies                                  | A paste of quill and bone is prepared in water and applied on the white scars.                        | Sharma (2002)                             |
| 18. | Mammal | Tiger            | <i>Panthera tigris</i> (Linnaeus, 1758)       | Kurimbas                                                                                                           | Flesh           | Leprosy                                             | The fat melted in an earthen pot and applied on the affected parts.                                   | Solavan et al (2004)                      |
| 19. | Mammal | Tiger            | <i>Panthera tigris</i> (Linnaeus, 1758)       | Kurimbas                                                                                                           | Fat             | Leprosy                                             | The fat melted in an earthen pot and applied on the affected parts.                                   | Solavan et al (2004)                      |

**Table 9- Animals and their products used in wound healing in India**

| S. No. |              | English Name | Scientific Name                            | Tribe/ Inhabitant/ Region        | Parts uses | Disease                               | Method of preparation and medicinal use                                                                              | Related reported author in |
|--------|--------------|--------------|--------------------------------------------|----------------------------------|------------|---------------------------------------|----------------------------------------------------------------------------------------------------------------------|----------------------------|
| 1.     | Invertebrate | Honey bee    | <i>Apis cerana indica</i> (Fabricius 1798) | Tirunelveli district, Tamil Nadu | honey      | Small cuts, ulcers, mouth and wounds. | For throat infection or any inflammation, honey mixed with lime (calcium carbonate) is applied on the affected area. | Ranjit Singh et al (2004)  |
| 2.     | Invertebrate | Honey bee    | <i>Apis dorsata</i> (Fabricius, 1793)      | Tirunelveli district, Tamil Nadu | honey      | Small cuts, ulcers, mouth and wounds. | For throat infection or any inflammation, honey mixed with lime (calcium carbonate) is applied on the affected area. | Ranjit Singh et al (2004)  |

|     |              |                    |                                                                                    |                                                                                                                                                                          |            |                                                       |                                                                                                                      |                                                        |
|-----|--------------|--------------------|------------------------------------------------------------------------------------|--------------------------------------------------------------------------------------------------------------------------------------------------------------------------|------------|-------------------------------------------------------|----------------------------------------------------------------------------------------------------------------------|--------------------------------------------------------|
| 3.  | Invertebrate | Honey bee          | <i>Apis florea</i> (Fabricius, 1787)                                               | Tirunelveli district, Tamil Nadu                                                                                                                                         | honey      | Small cuts, ulcers, mouth and wounds.                 | For throat infection or any inflammation, honey mixed with lime (calcium carbonate) is applied on the affected area. | Ranjit Singh et al (2004)                              |
| 4.  | Pisces       | Fish               | <i>Schizothorax richardsonii</i> (Gray, 1832)                                      | Shoka tribe of Uttaranchal                                                                                                                                               | Blood      | Wounds                                                | Fish Blood of cut fish is used in foot and mouth disease; it is also applied on sore wounds in legs too.             | Negi and palyal (2007)                                 |
| 5.  | Pisces       | Fish               | <i>Tor putitora</i> (Hamilton, 1822)                                               | Shoka tribe of Uttaranchal                                                                                                                                               | Blood      | Wounds                                                | Fish Blood of cut fish is used in foot and mouth disease; it is also applied on sore wounds in legs too.             | Negi and palyal (2007)                                 |
| 6.  | Reptile      | Garden lizard      | <i>Calotes versicolor</i> (Fitzinger, 1826)                                        | Shoka tribe of Uttaranchal                                                                                                                                               | Whole body | Wounds                                                | The whole animal is boiled in oil and the oil is then used to heal wounds on cattle's body.                          | Negi and palyal (2007)                                 |
| 7.  | Aves         | Martens bird       | <i>Martes flavigula</i> (Boddaert, 1785)                                           | Shoka tribe of Uttaranchal                                                                                                                                               | Bones      | Wounds                                                | A paste prepared from the bones of this bird is said to cure wounds.                                                 | Negi and palyal (2007)                                 |
| 8.  | Mammal       | Dog                | <i>Canis lupus familiaris</i> (Linnaeus, 1758)<br>Synonym- <i>Canis familiaris</i> | Kachchh                                                                                                                                                                  | Flesh      | Wounds                                                | Excreta are applied and flesh is eaten to treat wounds.                                                              | Gupta Leena et al (2003)                               |
| 9.  | Mammal       | Human              | <i>Homo sapiens</i> (Linnaeus, 1758)                                               | Ao, Angami, Sema, Khamniungan, Chakhesang, Lotha, Zeliang, Sangtam, Pochury, Konyak and Rengma tribes of Nagaland., Mogya, Bawaria, Meena and Saharia tribe of Rajasthan | Urine      | Wound healing                                         | Urine is applied on eye injuries. Also applied as antiseptic on fresh wounds.                                        | Jamir and Lal (2005), Mahawar and Jaroli (2006) (2007) |
| 10. | Mammal       | Porcupine          | <i>Hystrix indica</i> (Kerr, 1792)                                                 | Ao, Angami, Sema, Khamniungan, Lotha, Sangtam and Rengma tribes of Nagaland.                                                                                             | Fat        | Burn-wounds pain and rapid healing of fractured bones | Fat is applied to relieve burn-wounds pain and rapid healing of fractured bones.                                     | Jamir and Lal (2005)                                   |
| 11. | Mammal       | Rufous-tailed hare | <i>Lepus nigricollis</i> (F. Cuvier, 1823)                                         | Kachchh                                                                                                                                                                  | Blood      | Swelling                                              | Blood is applied externally for healing swelling                                                                     | Gupta Leena et al (2003)                               |

**Table 10- Animals and their products used in eye and ears problems in India.**

| S. No. |              | English Name                                     | Scientific Name                                                                          | Tribe/ Inhabitant/ Region                                                                                 | Parts uses | Disease               | Method of preparation and medicinal use                                                  | Related reported author in India |
|--------|--------------|--------------------------------------------------|------------------------------------------------------------------------------------------|-----------------------------------------------------------------------------------------------------------|------------|-----------------------|------------------------------------------------------------------------------------------|----------------------------------|
| 1.     | Invertebrate | Lightening Beetles or Fireflies or Lighting bugs | Photuris lucicrescens (Barber, 1951)                                                     | Chhattishgadh                                                                                             | Whole body | Cold borne earache    |                                                                                          | Oodhia (1995)                    |
| 2.     | Invertebrate | Honey bee                                        | <i>Apis cerana indica</i> (Fabricius 1798)                                               | Mogya, Bawaria, Meena and Saharia tribe of Rajasthan                                                      | Honey      | Eye disease           | Used as eye drops to cure eye disease.                                                   | Mahawar and Jaroli (2006) (2007) |
| 3.     | Invertebrate | Apple Snail                                      | <i>Pila globosa</i> (Swainson, 1822)                                                     | Ao, Angami, Sema, Khamniungan, Chakhesang, Lotha, Sangtam, Pochury, Konyak and Rengma tribes of Nagaland. | Flesh      | Eye related problems. | Flesh is eaten after cooking as eye related problems.                                    | Jamir and Lal (2005)             |
| 4.     | Invertebrate | Hermit Crab                                      | <i>Uca pugnax</i>                                                                        | Kachchh                                                                                                   | Whole body | Ear pains             | Crab is boiled in oil and used externally for curing ear pains.                          | Gupta Leena et al (2003)         |
| 5.     | Reptile      | Snakes                                           | <i>Gloydius himalayanus</i> (Günther, 1864)<br>Synonym-<br><i>Ancistrodon himalayans</i> | Shoka tribe of Uttaranchal                                                                                | Flesh      | Eyesight,             | The meat is believed to promote eyesight.                                                | Negi and palyal (2007)           |
| 6.     | Reptile      | Snakes                                           | <i>Ptyas mucosus</i> (Linnaeus, 1758)                                                    | Shoka tribe of Uttaranchal                                                                                | Flesh      | Eyesight,             | The meat is believed to promote eyesight.                                                | Negi and palyal (2007)           |
| 7.     | Reptile      | Snakes                                           | <i>Daboia russelii</i> (Shaw & Nodder, 1797)<br>Synonym-<br><i>Vipera russelli</i>       | Shoka tribe of Uttaranchal                                                                                | Flesh      | Eyesight,             | The meat is believed to promote eyesight.                                                | Negi and palyal (2007)           |
| 8.     | Aves         | Crow-pheasant                                    | <i>Centropus sinensis</i> (Stephens, 1815)                                               | Ao, Angami, Sema, Khamniungan, Chakhesang, Lotha, Zeliang, Sangtam, Pochury, Konyak and Rengma tribes of  | Bone       | Earache               | Bone is crushed to powder and suspended in water to prepare ear drop to relieve earache. | Jamir and Lal (2005)             |

|     |        |                              |                                                                                       |                                                                                                                                                                                                                 |         |                        |                                                                                                                                                             |                                                                                                                                    |
|-----|--------|------------------------------|---------------------------------------------------------------------------------------|-----------------------------------------------------------------------------------------------------------------------------------------------------------------------------------------------------------------|---------|------------------------|-------------------------------------------------------------------------------------------------------------------------------------------------------------|------------------------------------------------------------------------------------------------------------------------------------|
|     |        |                              |                                                                                       | Nagaland.                                                                                                                                                                                                       |         |                        |                                                                                                                                                             |                                                                                                                                    |
| 9.  | Aves   | Indian Roller                | <i>Coracias benghalensis</i><br>(Linnaeus, 1758)                                      | Bhil, Garasia, Kathodia of Rajasthan                                                                                                                                                                            | Feather | Earache and pus in ear | Feathers are rubbed in water and the ascence is used as an eardrop.                                                                                         | Sharma (2002)                                                                                                                      |
| 10. | Aves   | Crow                         | <i>Corvus splendens</i><br>(Vieillot, 1817)                                           | Ao Tribe of Nagaland                                                                                                                                                                                            | Bones   | Earache                | Crushed into powder, mixed with water and applied in ear drop by drop.                                                                                      | Kakati et al (2006)                                                                                                                |
| 11. | Aves   | Horse                        | <i>Equus caballus</i><br>(Linnaeus, 1758)                                             | Shoka tribe of Uttaranchal                                                                                                                                                                                      | Flesh   | Eyesight.              | Meat is believed to be a promoter of eyesight.                                                                                                              | Negi and palyal (2007)                                                                                                             |
| 12. | Aves   | Indian Peafowl<br>Or Peacock | <i>Pavo cristatus</i><br>(Linnaeus, 1758)                                             | Mogya, Bawaria, Meena and Saharia tribe of Rajasthan Nandurbar district of Maharashtra Bhil, Garasia, Kathodia of Rajasthan, Kachchh Ao, Angami, Sema, Khamniungan, Lotha, Zeliang, Konyak tribes of Nagaland., | Leg     | Ear infections         | Peacock's leg is rubbed with water and this essenced water is used in ear infections. Some tribes are boiled with oil, which is used to treat the ear pain. | Mahawar and Jaroli (2006), (2007) Patil (2003), Sharma (2002), Gupta Leena et al (2003), Jamir and Lal (2005), Kakati et al (2006) |
| 13. | Mammal | Cattle                       | <i>Bos taurus</i><br>(Linnaeus, 1758)<br>Synonym- <i>Bos indicus</i>                  | Shoka tribe of Uttaranchal                                                                                                                                                                                      | Bile    | Eye diseases           | It cures eye diseases.                                                                                                                                      | Negi and palyal (2007)                                                                                                             |
| 14. | Mammal | Dog                          | <i>Canis lupus familiaris</i><br>(Linnaeus, 1758)<br>Synonym- <i>Canis familiaris</i> | Ao, Angami, Sema, Khamniungan, Chakhesang, Lotha, Zeliang, Sangtam, Yimchunger, Pochury, Konyak and Rengma tribes of Nagaland., Mogya, Bawaria, Meena tribe of Rajasthan                                        | Urine   | Ear Problem            | Used as eardrop for curing earache.                                                                                                                         | Mahawar and Jaroli (2006), Jamir and Lal (2005)                                                                                    |
| 15. | Mammal | Goat                         | <i>Capra sibirica</i><br>(Pallas, 1776)                                               | Ao, Angami, Sema, Khamniungan, Chakhesang, Lotha, Zeliang, Sangtam, Pochury, Konyak and Rengma tribes of Nagaland.                                                                                              | Urine   | Night blindness,       | Urine is taken to cure night blindness.                                                                                                                     | Jamir and Lal (2005)                                                                                                               |

|     |        |          |                                                      |                                                                                                                                      |                   |                                    |                                                                                                                                    |                                                              |
|-----|--------|----------|------------------------------------------------------|--------------------------------------------------------------------------------------------------------------------------------------|-------------------|------------------------------------|------------------------------------------------------------------------------------------------------------------------------------|--------------------------------------------------------------|
| 16. | Mammal | Sambhar  | <i>Cervus unicolor</i><br>(Kerr, 1792)               | Mogya, Bawaria,<br>Meena tribe of<br>Rajasthan<br>and Kachchh                                                                        | Antler            | Eye ailments                       | Antler is rubbed with water this<br>paste is applied in eye<br>ailments.                                                           | Mahawar and<br>Jaroli (2006),<br>Gupta Leena et al<br>(2003) |
| 17. | Mammal | elephant | <i>Elephas<br/>maximus indicus</i><br>(Cuvier, 1798) | Tamilnadu tribes                                                                                                                     | tooth and<br>tusk | Conjunctivitis                     | Scratched tooth and tusks are<br>mixed with mother's milk and<br>applied topically on the<br>affected part before going to<br>bed. | Solavan et al<br>(2004)                                      |
| 18. | Mammal | Human    | <i>Homo sapiens</i><br>(Linnaeus, 1758)              | Ao, Angami, Sema,<br>Khamniungan,<br>Chakhesang, Lotha,<br>Zeliang, Sangtam,<br>Pochury, Konyak and<br>Rengma tribes of<br>Nagaland. | Milk              | Eyeache                            | Milk is applied as eye drop to<br>relieve eyeache.                                                                                 | Jamir and Lal<br>(2005)                                      |
| 19. | Mammal | Bat      | <i>Myotis lucifugus</i><br>(LeConte, 1831)           | Ao, Angami, Sema,<br>Khamniungan,<br>Chakhesang, Lotha,<br>Zeliang, Pochury,<br>Konyak and Rengma<br>tribes of Nagaland.             | Flesh             | Night<br>blindness                 | Flesh is cooked and eaten for<br>curing night blindness.                                                                           | Jamir and Lal<br>(2005)                                      |
| 20. | Mammal | Tiger    | <i>Panthera tigris</i><br>(Linnaeus, 1758)           | Ao, Angami, Sema,<br>Khamniungan,<br>Chakhesang, Lotha,<br>Zeliang, Sangtam,<br>Pochury, Konyak and<br>Rengma tribes of<br>Nagaland. | Milk              | Cataract and<br>night<br>blindness | Its milk cures cataract and<br>night blindness.                                                                                    | Jamir and Lal<br>(2005)                                      |

**Table 11 - Animals and their products used in burn in India.**

| S. No. |              | English<br>Name | Scientific<br>Name                                | Tribe/ Inhabitant/<br>Region        | Parts uses | Disease      | Method of preparation and<br>medicinal use                                                           | Related<br>reported<br>author in<br>India |
|--------|--------------|-----------------|---------------------------------------------------|-------------------------------------|------------|--------------|------------------------------------------------------------------------------------------------------|-------------------------------------------|
| 1.     | Invertebrate | Velvet ant      | <i>Dasymutilla<br/>occidentalis</i><br>(Linnaeus) | Tirunelveli district,<br>Tamil Nadu | Whole body | Inflammation | Along with bees wax, the powder<br>of this ant is used to prepare<br>ointment to treat inflammation. | Ranjit Singh et<br>al (2004)              |



|    |          |                     |                                                                         |                                                                                                                    |            |                    |                                                                                                   |                                   |
|----|----------|---------------------|-------------------------------------------------------------------------|--------------------------------------------------------------------------------------------------------------------|------------|--------------------|---------------------------------------------------------------------------------------------------|-----------------------------------|
| 2. | Amphibia | Frog                | Fejervarya limnocharis<br>synonym- <i>Lymnonecties limnorcharis</i>     | Ao, Angami, Sema, Khamniungan, Chakhesang, Lotha, Zeliang, Sangtam, Pochury, Konyak and Rengma tribes of Nagaland. | Skin       | Burn wounds        | Skin is applied on burn wounds for rapid healing.                                                 | Jamir and Lal (2005)              |
| 3. | Amphibia | Frog                | Hoplobatrachus tigerinus (Daudin, 1803)<br>synonym- <i>Rana tigrina</i> | Shoka tribe of Uttaranchal                                                                                         | Whole body | Burn               | Frog boiled in oil is used for healing wounds due to burn.                                        | Negi and palyal (2007)            |
| 4. | Reptile  | Hardshelled Turtle. | <i>Kachuga tentoria</i> (Gray, 1834)                                    | Saharia tribe                                                                                                      | Carapace   | Burn               | Ash of carapace mix with coconut oil and use for skin burns.                                      | Mahawar and Jaroli (2007)         |
| 5. | Reptile  | Monitor             | <i>Varanus bengalensis</i> (Daudin, 1758)                               | Ao Tribe of Nagaland Nandurbar district of Maharashtra                                                             | Fat        | Burn               | The fat (oil) of this lizard is used for Burn.                                                    | Kakati et al (2006), Patil (2003) |
| 6. | Aves     | Eagle               | <i>Aquila rapax</i> (Temminck, 1828)                                    | Ao Tribe of Nagaland                                                                                               | Fat        | Burn               | Applied locally.                                                                                  | Kakati et al (2006)               |
| 7. | Aves     | Domestic fowl       | <i>Gallus gallus domesticus</i>                                         | Ao Tribe of Nagaland                                                                                               | Fat        | Burn               | Raw fat warmed and applied locally.                                                               | Kakati et al (2006)               |
| 8. | Mammal   | Rufous-tailed hare  | <i>Lepus nigricollis</i> (F. Cuvier, 1823)                              | Kachchh                                                                                                            | Tail       | Burning sensation  | The ash of tail is mixed with oil and the prepared paste is applied for curing burning sensation. | Gupta Leena et al (2003)          |
| 9. | Mammal   | Black ibis          | <i>Pseudibis papillosa</i> (Temminck, 1824)                             | Kachchh                                                                                                            | Blood      | Burning sensation, | Blood is massaged for curing burning sensation.                                                   | Gupta Leena et al (2003)          |
| 10 | Mammal   | Domesticated pig    | <i>Sus scrofa domestica</i>                                             | Ao Tribe of Nagaland                                                                                               | Fat        | Burn               | Applied locally as embrocation/ Massager and in snakebite Used as antidote.                       | Kakati et al (2006)               |

**Table 12- Animals and their products used in antidotes in India.**

| S. No. |              | English Name     | Scientific Name                                                   | Tribe/ Inhabitant/ Region                                                                                          | Parts uses | Disease                | Method of preparation and medicinal use                                          | Related reported author in |
|--------|--------------|------------------|-------------------------------------------------------------------|--------------------------------------------------------------------------------------------------------------------|------------|------------------------|----------------------------------------------------------------------------------|----------------------------|
| 1.     | Invertebrate | Earthworm        | <i>Pheretima posthuma</i> (L. Vaillant, 1868)                     | Ao, Angami, Sema, Khamniungan, Chakhesang, Lotha, Zeliang, Sangtam, Pochury, Konyak and Rengma tribes of Nagaland. | Whole body | Snake and spider bites | Earthworm is eaten raw to serve as an antidote in snake and spider bites.        | Jamir and Lal (2005)       |
| 2.     | Aves         | Python           | Python reticulatus (Schneider, 1801)                              | Ao, Angami, Sema, Khamniungan, Chakhesang, Zeliang, Sangtam, Pochury, Konyak and Rengma tribes of Nagaland.        | Bile duct  | Spider and snake bite  | Its bile duct is used as an antidote against spider and snake bite.              | Jamir and Lal (2005)       |
| 3.     | Aves         | Monitor          | <i>Varanus bengalensis</i> (Daudin, 1758)                         | Ao Tribe of Nagaland                                                                                               | Bile duct  | Spider and snake bite  | Taken orally as antidote.                                                        | Kakati et al (2006)        |
| 4.     | Mammal       | Cow              | <i>Bos taurus</i> (Linnaeus, 1758)<br>Synonym- <i>Bos indicus</i> | Mogya, Bawaria, Meena tribe of Rajasthan                                                                           | Ghee       | Snake poison           | 250gm Ghee + 100gm Black pepper mixture given orally to neutralize snake poison. | Mahawar and Jaroli (2006)  |
| 5.     | Mammal       | Cattle           | <i>Bos taurus</i> (Linnaeus, 1758)<br>Synonym- <i>Bos indicus</i> | Shoka tribe of Uttaranchal                                                                                         | Bile       | Poisoning,             | It cures poisoning.                                                              | Negi and palyal (2007)     |
| 6.     | Mammal       | Flying squirrel  | <i>Petaurista petaurista</i> (Pallas, 1766)                       | Ao Tribe of Nagaland                                                                                               | Intestine  | Anti poison            | Cooked and eaten.                                                                | Kakati et al (2006)        |
| 7.     | Mammal       | Domesticated pig | <i>Sus scrofa domestica</i>                                       | Ao Tribe of Nagaland                                                                                               | Fat        | Snake bite             | Applied locally as embrocation/ massager and in snakebite used as antidote.      | Kakati et al (2006)        |

**Table 13- Animals and their products used in gynecological problems in India.**

| S.N. |  | English Name | Scientific Name | Tribe/ Inhabitant/ Region | Parts uses | Disease | Method of preparation and medicinal use | Related reported author in |
|------|--|--------------|-----------------|---------------------------|------------|---------|-----------------------------------------|----------------------------|
|------|--|--------------|-----------------|---------------------------|------------|---------|-----------------------------------------|----------------------------|

|    |              |                              |                                                                                                 |                                     |                      |                                         |                                                                                                                                                                                               |                              |
|----|--------------|------------------------------|-------------------------------------------------------------------------------------------------|-------------------------------------|----------------------|-----------------------------------------|-----------------------------------------------------------------------------------------------------------------------------------------------------------------------------------------------|------------------------------|
| 1. | Invertebrate | Silkworm                     | <i>Bombyx mori</i><br>(Linnaeus)                                                                | Tirunelveli district,<br>Tamil Nadu | Cocoon               | Menstruation<br>problem,<br>leucorrhoea | The cocoon ash of the silkworm is<br>used as a styptic, tonic and<br>astringent to check profuse<br>menstruation, leucorrhoea and<br>chronic diarrhea.                                        | Ranjit Singh et<br>al (2004) |
| 2. | Invertebrate | Green<br>Leafhopper<br>(GLH) | <i>Nephotettix<br/>nigropictus</i> (Stal,<br>1870)                                              | Chhattishgadh                       | Whole body           | Gonorrhoea                              |                                                                                                                                                                                               | Oodhia (1995)                |
| 3. | Aves         | Pigeon                       | <i>Columba livia</i><br>(Gmelin, 1789)                                                          | Chhattishgadh                       | Excreta              | Pregnancy                               | Putting the dried excreta inside<br>the vagina of childless woman is<br>very effective to make her<br>pregnant.                                                                               | Oodhia (2003<br>b)           |
| 4. | Mammal       | Himalayan<br>Thar            | <i>Hemitragus<br/>jemlahicus</i> (H.<br>Smith, 1826)                                            | Shoka tribe of<br>Uttaranchal       | Soup of the<br>bones | Parturition and<br>lactating            | The soup of the bones (of the<br>limbs) is principally given to the<br>womenfolk immediately after<br>giving birth to a child, and usually<br>during the parturition and<br>lactating months. | Negi and palyal<br>(2007)    |
| 5. | Mammal       | Hare                         | <i>Oryctolagus<br/>cuniculus</i><br>(Linnaeus, 1758)                                            | Shoka tribe of<br>Uttaranchal       | Flesh                | Menstrual<br>disorders                  | The meat is believed to cure<br>menstrual disorders.                                                                                                                                          | Negi and palyal<br>(2007)    |
| 6. | Mammal       | Hanuman<br>Monkey            | <i>Semnopithecus<br/>entellus</i><br>(Dufresne, 1797)<br>Synonyme-<br><i>Presbytis entellus</i> | Kathodia of Rajasthan               | Flesh                | Facilitates<br>delivery                 | Flesh is eaten by women at the<br>time of child birth.                                                                                                                                        | Sharma (2002)                |

**Table 14- Animals and their products used in miscellaneous diseases in India.**

| S.N. |              | English<br>Name                                              | Scientific Name                                | Tribe/<br>Inhabitant/<br>Region | Parts uses  | Disease                            | Method of preparation and<br>medicinal use                                         | Related<br>reported author<br>in India |
|------|--------------|--------------------------------------------------------------|------------------------------------------------|---------------------------------|-------------|------------------------------------|------------------------------------------------------------------------------------|----------------------------------------|
| 1.   | Invertebrate | Lightening<br>Beetles or<br>Fireflies or<br>Lighting<br>bugs | <i>Photuris lucicrescens</i><br>(Barber, 1951) | Chattishgadh                    | Whole body  | Styptic to<br>stop the<br>bleeding |                                                                                    | Oodhia (1995)                          |
| 2.   | Invertebrate | Bedbugs                                                      | <i>Cimex rotundatus</i><br>(Signoret, 1852)    | Shoka tribe of<br>Uttaranchal   | Whole body  | Ringworm                           | Bedbugs crushed in holy basil-<br><i>Ocimum sanctum</i> is applied on<br>ringworm. | Negi and palyal<br>(2007)              |
| 3.   | Invertebrate | Pod Borer                                                    | <i>Helicoverpa armigera</i>                    | Chattishgadh                    | Caterpillar | Eosinophilia                       | <i>Helicoverpa</i> caterpillar feeding on                                          | Oodhia (1995)                          |

|     |              |                          |                                                   |                                      |                            |                                                   |                                                                                                                                                                                                                                                                                                                                                                                                                        |                           |
|-----|--------------|--------------------------|---------------------------------------------------|--------------------------------------|----------------------------|---------------------------------------------------|------------------------------------------------------------------------------------------------------------------------------------------------------------------------------------------------------------------------------------------------------------------------------------------------------------------------------------------------------------------------------------------------------------------------|---------------------------|
|     |              |                          | (Hubner, 1805)                                    |                                      |                            |                                                   | Sphaeranthus leaves is used for the treatment of eosinophilia and asthma.                                                                                                                                                                                                                                                                                                                                              |                           |
| 4.  | Invertebrate | Housefly                 | <i>Musca domestica nebulosa</i> (Fabricius, 1784) | Chattishgadh                         | Whole body                 | To cure the cold fever                            | One housefly, half black pepper (Piper longum) and one pinch of asafoetida are mixed and this mixture is applied on eyes.                                                                                                                                                                                                                                                                                              | Oodhia (1995)             |
| 5.  | Invertebrate | Weaver ant               | <i>Oecophylla smaragdina</i> (Fabricius, 1775)    | Tirunelveli district, Tamil Nadu     | Eggs                       | Tetanic fever, high fever and even malarial fever | The eggs of this insect are used to prepare medicine with several species of medicinal herbs and administered to patients suffering from tetanic fever, ear pain, high fever and even malarial fever.                                                                                                                                                                                                                  | Ranjit Singh et al (2004) |
| 6.  | Invertebrate | Red Velvet Mite          | <i>Trombidium grandissimum</i> (Koch, 1867)       | Chattishgadh                         | Whole body                 | Malaria                                           |                                                                                                                                                                                                                                                                                                                                                                                                                        | Oodhia (1995)             |
| 7.  | Pisces       | Carp fish                | <i>Labeo gonius</i> (Hamilton, 1822)              | Dibrugarh District, Assam            | Edible portion of the fish | Obesity                                           | Curry prepared from the edible portion of fish is taken with rice on Saturday. The same process is repeated for another eight consecutive Saturdays.                                                                                                                                                                                                                                                                   | Kalita (2005)             |
| 8.  | Pisces       | Cuchia eel               | <i>Monopterusuchia</i> (Hamilton, 1822)           | Dibrugarh District, Assam            | Blood                      | Diabetes                                          | Fresh blood of a <i>M. cuchia</i> is taken orally empty stomach in the morning for four days. After completion of the above dosage an overnight dry <i>L. aspera</i> plant extract (two teaspoon) mixed with one spoonful of honey is allowed to lick mixed with one spoonful of honey. After 20 minutes about one-fourth glass of lukewarm water is given to drink and the process is continued for another two days. | Kalita (2005)             |
| 9.  | Reptile      | Common Garden Lizard     | <i>Calotes versicolor</i> (Fitzinger, 1826)       | Bhil, Garasia, Kathodia of Rajasthan | Flesh                      | Injuries of toes                                  | Warm flesh is kept on injuries of toes caused by stumbling.                                                                                                                                                                                                                                                                                                                                                            | Sharma (2002)             |
| 10. | Reptile      | Indian Flap shell turtle | <i>Lissemys punctata</i> (Lacépède, 1788)         | Kachchh                              | Carapace                   | Internal injuries, pruritis,                      | Carapace is burnt and ash is used for healing of internal injuries, pruritis.                                                                                                                                                                                                                                                                                                                                          | Gupta Leena et al (2003)  |
| 11. | Aves         | Jangli Murga (Wild Cock) | <i>Gallus sonneratii</i> (Temminck, 1813)         | Chattishgadh                         | Gall bladder               | Diabetes                                          | The patients to swallow the Pitta (Gall bladder) regularly up to seven days to get significant                                                                                                                                                                                                                                                                                                                         | Oodhia (2003 a)           |

|     |        |                  |                                                                   |                                            |             |                                       |                                                                                                                                         |                           |
|-----|--------|------------------|-------------------------------------------------------------------|--------------------------------------------|-------------|---------------------------------------|-----------------------------------------------------------------------------------------------------------------------------------------|---------------------------|
|     |        |                  |                                                                   |                                            |             |                                       | results.                                                                                                                                |                           |
| 12. | Aves   | Pigeon           | <i>Columba livia</i> (Gmelin, 1789)                               | Chattishgadh                               | Excreta     | Carbuncle                             | The patients to swallow the small dose of excreta with gud (jaggery).                                                                   | Oodhia (2003 b)           |
| 13. | Aves   | Pigeon           | <i>Columba livia</i> (Gmelin, 1789)                               | Chattishgadh                               | Excreta     | Enuresis (bed wetting)                | Swallow fresh excreta with gud (Jaggery) upto one week.                                                                                 | Oodhia (2003 b)           |
| 14. | Aves   | Hen              | <i>Gallus gallus domesticus</i>                                   | all the Thailand tribes                    | Egg albumin | Haematoma                             | Five gram of the solid leaf pulp of <i>Aloe littoralis</i> is soaked in egg albumin for 3 hrs.                                          | Solavan et al (2004)      |
| 15. | Aves   | House sparrow    | <i>Passer domesticus</i> (Linnaeus, 1758)                         | Ao Tribe of Nagaland                       | Flesh       | Stammering                            | Boiled in water and taken.                                                                                                              | Kakati et al (2006)       |
| 16. | Aves   | Peacock          | <i>Pavo cristatus</i> (Linnaeus, 1758)                            | Except Kanikaran, all the Tamilnadu tribes | Flesh       | Contracted limbs                      | The fat content of the visceral organs is melted over a short flame and applied externally on the contracted limbs.                     | Solavan et al (2004)      |
| 17. | Aves   | Peacock          | <i>Pavo cristatus</i> (Linnaeus, 1758)                            | Except Kanikaran, all the Tamilnadu tribes | Fat         | Contracted limbs                      | The fat content of the visceral organs is melted over a short flame and applied externally on the contracted limbs.                     | Solavan et al (2004)      |
| 18. | Aves   | Peacock          | <i>Pavo cristatus</i> (Linnaeus, 1758)                            | Except Kanikaran, all the Tamilnadu tribes | Feather     | Hiccups                               | Ten gram each of the seeds of <i>Piper longum</i> and <i>Cuminum cyminum</i> are powdered and mixed with 10 g ash of peacock's feather. | Solavan et al (2004)      |
| 19. | Mammal | Camel            | <i>Camelus dromedarius</i> (Linnaeus, 1758)                       | Chhattishgadh                              | Excreta     | Hydrocele                             | Excreta with haldi (Curcuma longa) and ginger (Zingiber officinalis) are a best remedy for hydrocele.                                   | Oodhia (2003 b)           |
| 20. | Mammal | Cow              | <i>Bos taurus</i> (Linnaeus, 1758)<br><i>Synonym- Bos indicus</i> | Mogya, Bawaria, Meena tribe of Rajasthan   | Urine       | Cancer                                | Given to cure cancer.                                                                                                                   | Mahawar and Jaroli (2006) |
| 21. | Mammal | Sambhar          | <i>Cervus unicolor</i> (Kerr, 1792)                               | Irular and Sholaga tribes                  | Penis       | Hydrocele                             | The dried penis is scratched in water and it is applied on the scrotum of man till the symptoms of hydrocele disappear.                 | Solavan et al (2004)      |
| 22. | Mammal | Indian porcupine | <i>Hystrix indica</i> (Kerr, 1792)                                | Bhil, Garasia, Kathodia of Rajasthan       | Fat         | Internal tumours                      | Freshly killed porcupine is boiled with water to extract fat and it's taken orally to cure internal tumours.                            | Sharma (2002)             |
| 23. | Mammal | Monkey           | <i>Macaca mulatta</i> (Zimmermann, 1780)                          | Shoka tribe of Uttaranchal                 | Flesh       | Adiposity, and parasitic infestation. | The meat is believed to cure, adiposity, anemia and parasitic infestation.                                                              | Negi and palyal (2007)    |

|     |        |                         |                                                                                            |                                            |              |                                                    |                                                                                                                                                                                                                                        |                             |
|-----|--------|-------------------------|--------------------------------------------------------------------------------------------|--------------------------------------------|--------------|----------------------------------------------------|----------------------------------------------------------------------------------------------------------------------------------------------------------------------------------------------------------------------------------------|-----------------------------|
| 24. | Mammal | Indian Pangolin         | <i>Manis crassicaudata</i><br>(Gray, 1827)                                                 | Bhil, Garasia,<br>Kathodia of<br>Rajasthan | Scale        | General and<br>pregnant<br>women feet<br>Swelling  | A paste is prepared in water by rubbing the Scales on stone and applied.                                                                                                                                                               | Sharma (2002)               |
| 25. | Mammal | Musk deer               | <i>Moschus moschiferus</i><br>(Linnaeus, 1758)                                             | Shoka tribe of<br>Uttaranchal              | Musk         | Immune<br>system in<br>children                    | The lactating mother are given a pinch of 'kasturi'-the musk with the belief that the children receiving the milk become immune to diseases, i.e. the musk is believed to bolster the immune system in children.                       | Negi and palyal<br>(2007)   |
| 26. | Mammal | Musk deer               | <i>Moschus moschiferus</i><br>(Linnaeus, 1758)                                             | Shoka tribe of<br>Uttaranchal              | Musk         | Malaria, high<br>fever and in<br>heart<br>ailments | Musk is used in the treatment of malaria, high fever and in heart ailments.                                                                                                                                                            | Negi and palyal<br>(2007)   |
| 27. | Mammal | Sherni<br>(Tigress)     | <i>Panthera tigris</i><br>(Linnaeus, 1758)                                                 | Chattishgadh                               | Excreta      | Alcoholic<br>drinks.                               | The healers give the addicted natives, a glass of drink (the last drink) and add few pinches of dried excreta in it.                                                                                                                   | Oodhia (2003 a)             |
| 28. | Mammal | Rat                     | <i>Rattus rattus</i><br>(Linnaeus, 1758)                                                   | Kachchh                                    | Whole body   | Bald head                                          | The animal is roasted and ash is mixed with mustard oil. This paste is mixed with the crushed leaves of <i>Rivea hypocrateriformis</i> (Fungvel) and Flowers of <i>Azadirachta indica</i> (Neem) and on the bald head.                 | Gupta Leena et al<br>(2003) |
| 29. | Mammal | Rat                     | <i>Rattus rattus</i><br>(Linnaeus, 1758)                                                   | Chattishgadh                               | Excreta      | Mad dog bite                                       | The traditional healers give patients the mixture containing Bhavri insect and rat excreta with Gud (Juggery).                                                                                                                         | Oodhia (2003 b)             |
| 30. | Mammal | Himalayan<br>black bear | <i>Ursus thibetanus</i><br>(G. Cuvier, 1823)<br>Synonym- <i>Selenarctos<br/>thibetanus</i> | Shoka tribe of<br>Uttaranchal              | Gall bladder | Malaria                                            | Its gall bladder is used for curing myriad diseases, malaria being one of them. The fresh gall bladder is filled with rice grains and then is left to dry out. After few days a yellowish powder is formed, which is used as medicine. | Negi and palyal<br>(2007)   |
| 31. | Mammal | Pig                     | <i>Sus scrofa domestica</i>                                                                | all the tribes<br>except Toda              | Fat          | Hemorrhoids                                        | The fat content of the adipose tissue of the pig is melted in an earthen pot and applied topically until hemorrhoids disappear.                                                                                                        | Solavan et al<br>(2004)     |
